# Supplementary material for: Vaccine beliefs, adverse effects, and quality of life in patients with cancer undergoing routine COVID-19 vaccination
Source: bioRxiv or medRxiv preprint supplement (doi:10.1101/2024.06.02.24308345), 2024-06-03
Supplement: Supplementary file [file media-1.pdf]

## Appendix 1- Methods

|                                                                                                                                  |   |
|----------------------------------------------------------------------------------------------------------------------------------|---|
| Appendix 1a Modified Oxford COVID-19 Vaccine Confidence and Complacency Scale (OCCS) for dose 3 .....                            | 1 |
| Appendix 1b Medically ascertained adverse event case report form .....                                                           | 4 |
| Appendix 1c Patient-Reported Outcomes version of the Common Terminology Criteria for Adverse Events (PRO-CTCAE®) questions ..... | 6 |

### Appendix 1a Modified Oxford COVID-19 Vaccine Confidence and Complacency Scale (OCCS) for dose 3

|                                                                                                                                                                                         |                                                                                                                                                                                                                                                                                                                                                                                                                  |   |                                            |   |                                     |   |                                                           |   |                                       |   |                                              |   |            |
|-----------------------------------------------------------------------------------------------------------------------------------------------------------------------------------------|------------------------------------------------------------------------------------------------------------------------------------------------------------------------------------------------------------------------------------------------------------------------------------------------------------------------------------------------------------------------------------------------------------------|---|--------------------------------------------|---|-------------------------------------|---|-----------------------------------------------------------|---|---------------------------------------|---|----------------------------------------------|---|------------|
| <p>Section Header: <i>Your opinions about the additional (booster) dose of the COVID-19 vaccine</i></p> <p>Do you think you will be infected with COVID-19 over the next 12 months?</p> | <p>radio</p> <table border="1"> <tr><td>1</td><td>Definitely</td></tr> <tr><td>2</td><td>Probably</td></tr> <tr><td>3</td><td>Possibly</td></tr> <tr><td>4</td><td>Probably not</td></tr> <tr><td>5</td><td>Definitely not</td></tr> <tr><td>6</td><td>Don't know</td></tr> </table>                                                                                                                             | 1 | Definitely                                 | 2 | Probably                            | 3 | Possibly                                                  | 4 | Probably not                          | 5 | Definitely not                               | 6 | Don't know |
| 1                                                                                                                                                                                       | Definitely                                                                                                                                                                                                                                                                                                                                                                                                       |   |                                            |   |                                     |   |                                                           |   |                                       |   |                                              |   |            |
| 2                                                                                                                                                                                       | Probably                                                                                                                                                                                                                                                                                                                                                                                                         |   |                                            |   |                                     |   |                                                           |   |                                       |   |                                              |   |            |
| 3                                                                                                                                                                                       | Possibly                                                                                                                                                                                                                                                                                                                                                                                                         |   |                                            |   |                                     |   |                                                           |   |                                       |   |                                              |   |            |
| 4                                                                                                                                                                                       | Probably not                                                                                                                                                                                                                                                                                                                                                                                                     |   |                                            |   |                                     |   |                                                           |   |                                       |   |                                              |   |            |
| 5                                                                                                                                                                                       | Definitely not                                                                                                                                                                                                                                                                                                                                                                                                   |   |                                            |   |                                     |   |                                                           |   |                                       |   |                                              |   |            |
| 6                                                                                                                                                                                       | Don't know                                                                                                                                                                                                                                                                                                                                                                                                       |   |                                            |   |                                     |   |                                                           |   |                                       |   |                                              |   |            |
| <p>The additional dose (booster) COVID-19 vaccine is likely to:</p>                                                                                                                     | <p>radio</p> <table border="1"> <tr><td>1</td><td>Work for almost everyone</td></tr> <tr><td>2</td><td>Work for most people</td></tr> <tr><td>3</td><td>I am unsure how many people it will work for</td></tr> <tr><td>4</td><td>Not work for most people</td></tr> <tr><td>5</td><td>Not work for anyone</td></tr> <tr><td>6</td><td>Don't know</td></tr> </table>                                              | 1 | Work for almost everyone                   | 2 | Work for most people                | 3 | I am unsure how many people it will work for              | 4 | Not work for most people              | 5 | Not work for anyone                          | 6 | Don't know |
| 1                                                                                                                                                                                       | Work for almost everyone                                                                                                                                                                                                                                                                                                                                                                                         |   |                                            |   |                                     |   |                                                           |   |                                       |   |                                              |   |            |
| 2                                                                                                                                                                                       | Work for most people                                                                                                                                                                                                                                                                                                                                                                                             |   |                                            |   |                                     |   |                                                           |   |                                       |   |                                              |   |            |
| 3                                                                                                                                                                                       | I am unsure how many people it will work for                                                                                                                                                                                                                                                                                                                                                                     |   |                                            |   |                                     |   |                                                           |   |                                       |   |                                              |   |            |
| 4                                                                                                                                                                                       | Not work for most people                                                                                                                                                                                                                                                                                                                                                                                         |   |                                            |   |                                     |   |                                                           |   |                                       |   |                                              |   |            |
| 5                                                                                                                                                                                       | Not work for anyone                                                                                                                                                                                                                                                                                                                                                                                              |   |                                            |   |                                     |   |                                                           |   |                                       |   |                                              |   |            |
| 6                                                                                                                                                                                       | Don't know                                                                                                                                                                                                                                                                                                                                                                                                       |   |                                            |   |                                     |   |                                                           |   |                                       |   |                                              |   |            |
| <p>The additional dose (booster) COVID-19 vaccine is likely to:</p>                                                                                                                     | <p>radio</p> <table border="1"> <tr><td>1</td><td>Definitely work for me</td></tr> <tr><td>2</td><td>Probably work for me</td></tr> <tr><td>3</td><td>May or may not work for me</td></tr> <tr><td>4</td><td>Probably not work for me</td></tr> <tr><td>5</td><td>Definitely not work for me</td></tr> <tr><td>6</td><td>Don't know</td></tr> </table>                                                           | 1 | Definitely work for me                     | 2 | Probably work for me                | 3 | May or may not work for me                                | 4 | Probably not work for me              | 5 | Definitely not work for me                   | 6 | Don't know |
| 1                                                                                                                                                                                       | Definitely work for me                                                                                                                                                                                                                                                                                                                                                                                           |   |                                            |   |                                     |   |                                                           |   |                                       |   |                                              |   |            |
| 2                                                                                                                                                                                       | Probably work for me                                                                                                                                                                                                                                                                                                                                                                                             |   |                                            |   |                                     |   |                                                           |   |                                       |   |                                              |   |            |
| 3                                                                                                                                                                                       | May or may not work for me                                                                                                                                                                                                                                                                                                                                                                                       |   |                                            |   |                                     |   |                                                           |   |                                       |   |                                              |   |            |
| 4                                                                                                                                                                                       | Probably not work for me                                                                                                                                                                                                                                                                                                                                                                                         |   |                                            |   |                                     |   |                                                           |   |                                       |   |                                              |   |            |
| 5                                                                                                                                                                                       | Definitely not work for me                                                                                                                                                                                                                                                                                                                                                                                       |   |                                            |   |                                     |   |                                                           |   |                                       |   |                                              |   |            |
| 6                                                                                                                                                                                       | Don't know                                                                                                                                                                                                                                                                                                                                                                                                       |   |                                            |   |                                     |   |                                                           |   |                                       |   |                                              |   |            |
| <p>If I get the additional dose (booster) COVID-19 vaccine it will be:</p>                                                                                                              | <p>radio</p> <table border="1"> <tr><td>1</td><td>Really helpful for the community around me</td></tr> <tr><td>2</td><td>Helpful for the community around me</td></tr> <tr><td>3</td><td>Neither helpful nor unhelpful for the community around me</td></tr> <tr><td>4</td><td>Unhelpful for the community around me</td></tr> <tr><td>5</td><td>Really unhelpful for the community around me</td></tr> </table> | 1 | Really helpful for the community around me | 2 | Helpful for the community around me | 3 | Neither helpful nor unhelpful for the community around me | 4 | Unhelpful for the community around me | 5 | Really unhelpful for the community around me |   |            |
| 1                                                                                                                                                                                       | Really helpful for the community around me                                                                                                                                                                                                                                                                                                                                                                       |   |                                            |   |                                     |   |                                                           |   |                                       |   |                                              |   |            |
| 2                                                                                                                                                                                       | Helpful for the community around me                                                                                                                                                                                                                                                                                                                                                                              |   |                                            |   |                                     |   |                                                           |   |                                       |   |                                              |   |            |
| 3                                                                                                                                                                                       | Neither helpful nor unhelpful for the community around me                                                                                                                                                                                                                                                                                                                                                        |   |                                            |   |                                     |   |                                                           |   |                                       |   |                                              |   |            |
| 4                                                                                                                                                                                       | Unhelpful for the community around me                                                                                                                                                                                                                                                                                                                                                                            |   |                                            |   |                                     |   |                                                           |   |                                       |   |                                              |   |            |
| 5                                                                                                                                                                                       | Really unhelpful for the community around me                                                                                                                                                                                                                                                                                                                                                                     |   |                                            |   |                                     |   |                                                           |   |                                       |   |                                              |   |            |

|                                                                                     |                                                                                                                                                                                                                                                                                                                                                                                                                       |   |                                     |   |                             |   |                                                        |   |                         |   |                                  |   |            |
|-------------------------------------------------------------------------------------|-----------------------------------------------------------------------------------------------------------------------------------------------------------------------------------------------------------------------------------------------------------------------------------------------------------------------------------------------------------------------------------------------------------------------|---|-------------------------------------|---|-----------------------------|---|--------------------------------------------------------|---|-------------------------|---|----------------------------------|---|------------|
|                                                                                     | <table border="1"> <tr> <td>6</td> <td>Don't know</td> </tr> </table>                                                                                                                                                                                                                                                                                                                                                 | 6 | Don't know                          |   |                             |   |                                                        |   |                         |   |                                  |   |            |
| 6                                                                                   | Don't know                                                                                                                                                                                                                                                                                                                                                                                                            |   |                                     |   |                             |   |                                                        |   |                         |   |                                  |   |            |
| If individuals like me get the additional dose (booster) COVID-19 vaccine it will:  | radio <table border="1"> <tr> <td>1</td> <td>Save a large number of lives</td> </tr> <tr> <td>2</td> <td>Save some lives</td> </tr> <tr> <td>3</td> <td>Have no impact</td> </tr> <tr> <td>4</td> <td>Lead to more deaths</td> </tr> <tr> <td>5</td> <td>Lead to a large number of deaths</td> </tr> <tr> <td>6</td> <td>Don't know</td> </tr> </table>                                                               | 1 | Save a large number of lives        | 2 | Save some lives             | 3 | Have no impact                                         | 4 | Lead to more deaths     | 5 | Lead to a large number of deaths | 6 | Don't know |
| 1                                                                                   | Save a large number of lives                                                                                                                                                                                                                                                                                                                                                                                          |   |                                     |   |                             |   |                                                        |   |                         |   |                                  |   |            |
| 2                                                                                   | Save some lives                                                                                                                                                                                                                                                                                                                                                                                                       |   |                                     |   |                             |   |                                                        |   |                         |   |                                  |   |            |
| 3                                                                                   | Have no impact                                                                                                                                                                                                                                                                                                                                                                                                        |   |                                     |   |                             |   |                                                        |   |                         |   |                                  |   |            |
| 4                                                                                   | Lead to more deaths                                                                                                                                                                                                                                                                                                                                                                                                   |   |                                     |   |                             |   |                                                        |   |                         |   |                                  |   |            |
| 5                                                                                   | Lead to a large number of deaths                                                                                                                                                                                                                                                                                                                                                                                      |   |                                     |   |                             |   |                                                        |   |                         |   |                                  |   |            |
| 6                                                                                   | Don't know                                                                                                                                                                                                                                                                                                                                                                                                            |   |                                     |   |                             |   |                                                        |   |                         |   |                                  |   |            |
| If many people do not get the additional dose (booster) vaccine this:               | radio <table border="1"> <tr> <td>1</td> <td>Will be dangerous</td> </tr> <tr> <td>2</td> <td>May be dangerous</td> </tr> <tr> <td>3</td> <td>Will have no consequences at all</td> </tr> <tr> <td>4</td> <td>May be good</td> </tr> <tr> <td>5</td> <td>Will be good</td> </tr> <tr> <td>6</td> <td>Don't know</td> </tr> </table>                                                                                   | 1 | Will be dangerous                   | 2 | May be dangerous            | 3 | Will have no consequences at all                       | 4 | May be good             | 5 | Will be good                     | 6 | Don't know |
| 1                                                                                   | Will be dangerous                                                                                                                                                                                                                                                                                                                                                                                                     |   |                                     |   |                             |   |                                                        |   |                         |   |                                  |   |            |
| 2                                                                                   | May be dangerous                                                                                                                                                                                                                                                                                                                                                                                                      |   |                                     |   |                             |   |                                                        |   |                         |   |                                  |   |            |
| 3                                                                                   | Will have no consequences at all                                                                                                                                                                                                                                                                                                                                                                                      |   |                                     |   |                             |   |                                                        |   |                         |   |                                  |   |            |
| 4                                                                                   | May be good                                                                                                                                                                                                                                                                                                                                                                                                           |   |                                     |   |                             |   |                                                        |   |                         |   |                                  |   |            |
| 5                                                                                   | Will be good                                                                                                                                                                                                                                                                                                                                                                                                          |   |                                     |   |                             |   |                                                        |   |                         |   |                                  |   |            |
| 6                                                                                   | Don't know                                                                                                                                                                                                                                                                                                                                                                                                            |   |                                     |   |                             |   |                                                        |   |                         |   |                                  |   |            |
| I expect that receiving the vaccine will be:                                        | radio <table border="1"> <tr> <td>1</td> <td>Hardly noticeable</td> </tr> <tr> <td>2</td> <td>A little unpleasant</td> </tr> <tr> <td>3</td> <td>Moderately unpleasant</td> </tr> <tr> <td>4</td> <td>Painful</td> </tr> <tr> <td>5</td> <td>Extremely painful</td> </tr> <tr> <td>6</td> <td>Don't know</td> </tr> </table>                                                                                          | 1 | Hardly noticeable                   | 2 | A little unpleasant         | 3 | Moderately unpleasant                                  | 4 | Painful                 | 5 | Extremely painful                | 6 | Don't know |
| 1                                                                                   | Hardly noticeable                                                                                                                                                                                                                                                                                                                                                                                                     |   |                                     |   |                             |   |                                                        |   |                         |   |                                  |   |            |
| 2                                                                                   | A little unpleasant                                                                                                                                                                                                                                                                                                                                                                                                   |   |                                     |   |                             |   |                                                        |   |                         |   |                                  |   |            |
| 3                                                                                   | Moderately unpleasant                                                                                                                                                                                                                                                                                                                                                                                                 |   |                                     |   |                             |   |                                                        |   |                         |   |                                  |   |            |
| 4                                                                                   | Painful                                                                                                                                                                                                                                                                                                                                                                                                               |   |                                     |   |                             |   |                                                        |   |                         |   |                                  |   |            |
| 5                                                                                   | Extremely painful                                                                                                                                                                                                                                                                                                                                                                                                     |   |                                     |   |                             |   |                                                        |   |                         |   |                                  |   |            |
| 6                                                                                   | Don't know                                                                                                                                                                                                                                                                                                                                                                                                            |   |                                     |   |                             |   |                                                        |   |                         |   |                                  |   |            |
| The side effects of getting the additional dose (booster) COVID-19 vaccine will be: | radio <table border="1"> <tr> <td>1</td> <td>None</td> </tr> <tr> <td>2</td> <td>Mild</td> </tr> <tr> <td>3</td> <td>Moderate</td> </tr> <tr> <td>4</td> <td>Significant</td> </tr> <tr> <td>5</td> <td>Life threatening</td> </tr> <tr> <td>6</td> <td>Don't know</td> </tr> </table>                                                                                                                                | 1 | None                                | 2 | Mild                        | 3 | Moderate                                               | 4 | Significant             | 5 | Life threatening                 | 6 | Don't know |
| 1                                                                                   | None                                                                                                                                                                                                                                                                                                                                                                                                                  |   |                                     |   |                             |   |                                                        |   |                         |   |                                  |   |            |
| 2                                                                                   | Mild                                                                                                                                                                                                                                                                                                                                                                                                                  |   |                                     |   |                             |   |                                                        |   |                         |   |                                  |   |            |
| 3                                                                                   | Moderate                                                                                                                                                                                                                                                                                                                                                                                                              |   |                                     |   |                             |   |                                                        |   |                         |   |                                  |   |            |
| 4                                                                                   | Significant                                                                                                                                                                                                                                                                                                                                                                                                           |   |                                     |   |                             |   |                                                        |   |                         |   |                                  |   |            |
| 5                                                                                   | Life threatening                                                                                                                                                                                                                                                                                                                                                                                                      |   |                                     |   |                             |   |                                                        |   |                         |   |                                  |   |            |
| 6                                                                                   | Don't know                                                                                                                                                                                                                                                                                                                                                                                                            |   |                                     |   |                             |   |                                                        |   |                         |   |                                  |   |            |
| The additional dose (booster) COVID-19 vaccine will:                                | radio <table border="1"> <tr> <td>1</td> <td>Greatly strengthen my immune system</td> </tr> <tr> <td>2</td> <td>Strengthen my immune system</td> </tr> <tr> <td>3</td> <td>It will neither strengthen nor weaken my immune system</td> </tr> <tr> <td>4</td> <td>Weaken my immune system</td> </tr> <tr> <td>5</td> <td>Greatly weaken my immune system</td> </tr> <tr> <td>6</td> <td>Don't know</td> </tr> </table> | 1 | Greatly strengthen my immune system | 2 | Strengthen my immune system | 3 | It will neither strengthen nor weaken my immune system | 4 | Weaken my immune system | 5 | Greatly weaken my immune system  | 6 | Don't know |
| 1                                                                                   | Greatly strengthen my immune system                                                                                                                                                                                                                                                                                                                                                                                   |   |                                     |   |                             |   |                                                        |   |                         |   |                                  |   |            |
| 2                                                                                   | Strengthen my immune system                                                                                                                                                                                                                                                                                                                                                                                           |   |                                     |   |                             |   |                                                        |   |                         |   |                                  |   |            |
| 3                                                                                   | It will neither strengthen nor weaken my immune system                                                                                                                                                                                                                                                                                                                                                                |   |                                     |   |                             |   |                                                        |   |                         |   |                                  |   |            |
| 4                                                                                   | Weaken my immune system                                                                                                                                                                                                                                                                                                                                                                                               |   |                                     |   |                             |   |                                                        |   |                         |   |                                  |   |            |
| 5                                                                                   | Greatly weaken my immune system                                                                                                                                                                                                                                                                                                                                                                                       |   |                                     |   |                             |   |                                                        |   |                         |   |                                  |   |            |
| 6                                                                                   | Don't know                                                                                                                                                                                                                                                                                                                                                                                                            |   |                                     |   |                             |   |                                                        |   |                         |   |                                  |   |            |

|                                                                                                                        |                                                                                                                                                                                                                                                                                                                                                                                                                                                                                   |       |  |   |                                                                  |   |                              |   |                                                 |   |                          |   |                                                         |   |            |
|------------------------------------------------------------------------------------------------------------------------|-----------------------------------------------------------------------------------------------------------------------------------------------------------------------------------------------------------------------------------------------------------------------------------------------------------------------------------------------------------------------------------------------------------------------------------------------------------------------------------|-------|--|---|------------------------------------------------------------------|---|------------------------------|---|-------------------------------------------------|---|--------------------------|---|---------------------------------------------------------|---|------------|
| Taking the additional dose (booster) COVID-19 vaccine:                                                                 | <table border="1"> <tr><td colspan="2">radio</td></tr> <tr><td>1</td><td>Will give me added confidence to get on with life just as before</td></tr> <tr><td>2</td><td>Will give me greater freedom</td></tr> <tr><td>3</td><td>Will have no effect on my confidence or freedom</td></tr> <tr><td>4</td><td>Will restrict my freedom</td></tr> <tr><td>5</td><td>Will completely restrict my freedom to get on with life</td></tr> <tr><td>6</td><td>Don't know</td></tr> </table> | radio |  | 1 | Will give me added confidence to get on with life just as before | 2 | Will give me greater freedom | 3 | Will have no effect on my confidence or freedom | 4 | Will restrict my freedom | 5 | Will completely restrict my freedom to get on with life | 6 | Don't know |
| radio                                                                                                                  |                                                                                                                                                                                                                                                                                                                                                                                                                                                                                   |       |  |   |                                                                  |   |                              |   |                                                 |   |                          |   |                                                         |   |            |
| 1                                                                                                                      | Will give me added confidence to get on with life just as before                                                                                                                                                                                                                                                                                                                                                                                                                  |       |  |   |                                                                  |   |                              |   |                                                 |   |                          |   |                                                         |   |            |
| 2                                                                                                                      | Will give me greater freedom                                                                                                                                                                                                                                                                                                                                                                                                                                                      |       |  |   |                                                                  |   |                              |   |                                                 |   |                          |   |                                                         |   |            |
| 3                                                                                                                      | Will have no effect on my confidence or freedom                                                                                                                                                                                                                                                                                                                                                                                                                                   |       |  |   |                                                                  |   |                              |   |                                                 |   |                          |   |                                                         |   |            |
| 4                                                                                                                      | Will restrict my freedom                                                                                                                                                                                                                                                                                                                                                                                                                                                          |       |  |   |                                                                  |   |                              |   |                                                 |   |                          |   |                                                         |   |            |
| 5                                                                                                                      | Will completely restrict my freedom to get on with life                                                                                                                                                                                                                                                                                                                                                                                                                           |       |  |   |                                                                  |   |                              |   |                                                 |   |                          |   |                                                         |   |            |
| 6                                                                                                                      | Don't know                                                                                                                                                                                                                                                                                                                                                                                                                                                                        |       |  |   |                                                                  |   |                              |   |                                                 |   |                          |   |                                                         |   |            |
| Taking the additional dose (booster) COVID-19 vaccine will make me feel like a guinea pig                              | <table border="1"> <tr><td colspan="2">radio</td></tr> <tr><td>1</td><td>Do not agree</td></tr> <tr><td>2</td><td>Agree a little</td></tr> <tr><td>3</td><td>Agree moderately</td></tr> <tr><td>4</td><td>Agree a lot</td></tr> <tr><td>5</td><td>Completely agree</td></tr> <tr><td>6</td><td>Don't know</td></tr> </table>                                                                                                                                                      | radio |  | 1 | Do not agree                                                     | 2 | Agree a little               | 3 | Agree moderately                                | 4 | Agree a lot              | 5 | Completely agree                                        | 6 | Don't know |
| radio                                                                                                                  |                                                                                                                                                                                                                                                                                                                                                                                                                                                                                   |       |  |   |                                                                  |   |                              |   |                                                 |   |                          |   |                                                         |   |            |
| 1                                                                                                                      | Do not agree                                                                                                                                                                                                                                                                                                                                                                                                                                                                      |       |  |   |                                                                  |   |                              |   |                                                 |   |                          |   |                                                         |   |            |
| 2                                                                                                                      | Agree a little                                                                                                                                                                                                                                                                                                                                                                                                                                                                    |       |  |   |                                                                  |   |                              |   |                                                 |   |                          |   |                                                         |   |            |
| 3                                                                                                                      | Agree moderately                                                                                                                                                                                                                                                                                                                                                                                                                                                                  |       |  |   |                                                                  |   |                              |   |                                                 |   |                          |   |                                                         |   |            |
| 4                                                                                                                      | Agree a lot                                                                                                                                                                                                                                                                                                                                                                                                                                                                       |       |  |   |                                                                  |   |                              |   |                                                 |   |                          |   |                                                         |   |            |
| 5                                                                                                                      | Completely agree                                                                                                                                                                                                                                                                                                                                                                                                                                                                  |       |  |   |                                                                  |   |                              |   |                                                 |   |                          |   |                                                         |   |            |
| 6                                                                                                                      | Don't know                                                                                                                                                                                                                                                                                                                                                                                                                                                                        |       |  |   |                                                                  |   |                              |   |                                                 |   |                          |   |                                                         |   |            |
| My experience with the previous vaccine doses makes me worried about receiving an additional dose                      | <table border="1"> <tr><td colspan="2">radio</td></tr> <tr><td>1</td><td>A lot</td></tr> <tr><td>2</td><td>Quite a bit</td></tr> <tr><td>3</td><td>A little bit</td></tr> <tr><td>4</td><td>Not at all</td></tr> <tr><td>5</td><td>I'm not sure either way</td></tr> </table>                                                                                                                                                                                                     | radio |  | 1 | A lot                                                            | 2 | Quite a bit                  | 3 | A little bit                                    | 4 | Not at all               | 5 | I'm not sure either way                                 |   |            |
| radio                                                                                                                  |                                                                                                                                                                                                                                                                                                                                                                                                                                                                                   |       |  |   |                                                                  |   |                              |   |                                                 |   |                          |   |                                                         |   |            |
| 1                                                                                                                      | A lot                                                                                                                                                                                                                                                                                                                                                                                                                                                                             |       |  |   |                                                                  |   |                              |   |                                                 |   |                          |   |                                                         |   |            |
| 2                                                                                                                      | Quite a bit                                                                                                                                                                                                                                                                                                                                                                                                                                                                       |       |  |   |                                                                  |   |                              |   |                                                 |   |                          |   |                                                         |   |            |
| 3                                                                                                                      | A little bit                                                                                                                                                                                                                                                                                                                                                                                                                                                                      |       |  |   |                                                                  |   |                              |   |                                                 |   |                          |   |                                                         |   |            |
| 4                                                                                                                      | Not at all                                                                                                                                                                                                                                                                                                                                                                                                                                                                        |       |  |   |                                                                  |   |                              |   |                                                 |   |                          |   |                                                         |   |            |
| 5                                                                                                                      | I'm not sure either way                                                                                                                                                                                                                                                                                                                                                                                                                                                           |       |  |   |                                                                  |   |                              |   |                                                 |   |                          |   |                                                         |   |            |
| I believe that an additional vaccine dose is a good idea for me and other people with similar medical conditions to me | <table border="1"> <tr><td colspan="2">radio</td></tr> <tr><td>1</td><td>Strongly agree</td></tr> <tr><td>2</td><td>Agree</td></tr> <tr><td>3</td><td>Neither agree nor disagree</td></tr> <tr><td>4</td><td>Disagree</td></tr> <tr><td>5</td><td>Strongly disagree</td></tr> <tr><td>6</td><td>Don't know</td></tr> </table>                                                                                                                                                     | radio |  | 1 | Strongly agree                                                   | 2 | Agree                        | 3 | Neither agree nor disagree                      | 4 | Disagree                 | 5 | Strongly disagree                                       | 6 | Don't know |
| radio                                                                                                                  |                                                                                                                                                                                                                                                                                                                                                                                                                                                                                   |       |  |   |                                                                  |   |                              |   |                                                 |   |                          |   |                                                         |   |            |
| 1                                                                                                                      | Strongly agree                                                                                                                                                                                                                                                                                                                                                                                                                                                                    |       |  |   |                                                                  |   |                              |   |                                                 |   |                          |   |                                                         |   |            |
| 2                                                                                                                      | Agree                                                                                                                                                                                                                                                                                                                                                                                                                                                                             |       |  |   |                                                                  |   |                              |   |                                                 |   |                          |   |                                                         |   |            |
| 3                                                                                                                      | Neither agree nor disagree                                                                                                                                                                                                                                                                                                                                                                                                                                                        |       |  |   |                                                                  |   |                              |   |                                                 |   |                          |   |                                                         |   |            |
| 4                                                                                                                      | Disagree                                                                                                                                                                                                                                                                                                                                                                                                                                                                          |       |  |   |                                                                  |   |                              |   |                                                 |   |                          |   |                                                         |   |            |
| 5                                                                                                                      | Strongly disagree                                                                                                                                                                                                                                                                                                                                                                                                                                                                 |       |  |   |                                                                  |   |                              |   |                                                 |   |                          |   |                                                         |   |            |
| 6                                                                                                                      | Don't know                                                                                                                                                                                                                                                                                                                                                                                                                                                                        |       |  |   |                                                                  |   |                              |   |                                                 |   |                          |   |                                                         |   |            |
| Regarding the timing of the extra dose- I think this is:                                                               | <table border="1"> <tr><td colspan="2">radio</td></tr> <tr><td>1</td><td>Too early</td></tr> <tr><td>2</td><td>About right</td></tr> <tr><td>3</td><td>Too late</td></tr> <tr><td>4</td><td>I am unsure either way</td></tr> <tr><td>5</td><td>I don't think it is necessary</td></tr> </table>                                                                                                                                                                                   | radio |  | 1 | Too early                                                        | 2 | About right                  | 3 | Too late                                        | 4 | I am unsure either way   | 5 | I don't think it is necessary                           |   |            |
| radio                                                                                                                  |                                                                                                                                                                                                                                                                                                                                                                                                                                                                                   |       |  |   |                                                                  |   |                              |   |                                                 |   |                          |   |                                                         |   |            |
| 1                                                                                                                      | Too early                                                                                                                                                                                                                                                                                                                                                                                                                                                                         |       |  |   |                                                                  |   |                              |   |                                                 |   |                          |   |                                                         |   |            |
| 2                                                                                                                      | About right                                                                                                                                                                                                                                                                                                                                                                                                                                                                       |       |  |   |                                                                  |   |                              |   |                                                 |   |                          |   |                                                         |   |            |
| 3                                                                                                                      | Too late                                                                                                                                                                                                                                                                                                                                                                                                                                                                          |       |  |   |                                                                  |   |                              |   |                                                 |   |                          |   |                                                         |   |            |
| 4                                                                                                                      | I am unsure either way                                                                                                                                                                                                                                                                                                                                                                                                                                                            |       |  |   |                                                                  |   |                              |   |                                                 |   |                          |   |                                                         |   |            |
| 5                                                                                                                      | I don't think it is necessary                                                                                                                                                                                                                                                                                                                                                                                                                                                     |       |  |   |                                                                  |   |                              |   |                                                 |   |                          |   |                                                         |   |            |

**Appendix 1b Medically ascertained adverse event case report form**

- a. Was there a serious adverse event (SAE) dose 1 until 1 month post dose 2?
- b. Was there an SAE from dose 3 until 1 month post dose 3?
- c. For each SAE: Date- SAE term as per CTCAE- Was the SAE attributable to the vaccine according to the treating physician?
- d. Was cancer treatment delayed from any time between dose 1 and one month post dose 2?  
 Yes- vaccine related  
 Yes- treatment toxicity  
 Yes- Other  
 No
- e. Reason for vaccine-related dose delay
- f. Was cancer treatment delayed from any time between dose 3 and one month post dose 3?  
 Yes- vaccine related  
 Yes- treatment toxicity  
 Yes- Other  
 No
- g. Reason for vaccine-related dose delay
- h. Cancer treatment modification from dose 1 until 1 month post dose 2?

|   |                                                                                       |
|---|---------------------------------------------------------------------------------------|
| 1 | Yes- completed planned treatment                                                      |
| 2 | Yes- intolerance to one of treatment drugs or adverse event related to treatment drug |
| 3 | Yes- disease progression                                                              |
| 4 | Yes - other- insert reason                                                            |
| 5 | Yes- vaccine related issue                                                            |
| 0 | No                                                                                    |

- i. Cancer treatment modification from dose 3 until 1 month post dose 3?

|                                                                                       |
|---------------------------------------------------------------------------------------|
| Yes- completed planned treatment                                                      |
| Yes- intolerance to one of treatment drugs or adverse event related to treatment drug |
| Yes- disease progression                                                              |
| Yes - other- insert reason                                                            |
| Yes- vaccine related issue                                                            |
| No                                                                                    |

- j. Thrombotic event between dose 1 and one month post dose 2?

|   |                                      |
|---|--------------------------------------|
| 0 | No                                   |
| 1 | Yes- deep vein thrombosis            |
| 2 | Yes - pulmonary embolism             |
| 3 | Yes- other venous thrombosis (state) |
| 4 | Yes - coronary artery event          |
| 5 | Yes- cerebrovascular event           |
| 6 | Yes- other arterial thrombus (state) |

- k. Thrombotic event between dose 3 and one month post dose 3?
- l. Allergic reaction due to dose 1- 2 or 3?
- m. Decline in performance status between dose 1 and one month post dose 2
- n. Decline in performance status between dose 3 and one month post dose 3?
- o. Lymphadenopathy seen clinically/on imaging between dose 1 and one month post dose 2
- p. Lymphadenopathy seen clinically/on imaging between dose 3 and one month post dose 3
- q. Any other AE potentially attributable to vaccine during study period? Define as per CTCAE (term and grade)

**Appendix 1c Patient-Reported Outcomes version of the Common Terminology Criteria for Adverse Events (PRO-CTCAE®) questions**

|                                                                                                                                                   |                                                                                                                                                                                                                                                                                                                                                                                                                                                                     |                                                                                                     |               |    |                                                        |               |                                                                     |   |                                                     |                                                                                                     |                                                                                        |   |                                                   |
|---------------------------------------------------------------------------------------------------------------------------------------------------|---------------------------------------------------------------------------------------------------------------------------------------------------------------------------------------------------------------------------------------------------------------------------------------------------------------------------------------------------------------------------------------------------------------------------------------------------------------------|-----------------------------------------------------------------------------------------------------|---------------|----|--------------------------------------------------------|---------------|---------------------------------------------------------------------|---|-----------------------------------------------------|-----------------------------------------------------------------------------------------------------|----------------------------------------------------------------------------------------|---|---------------------------------------------------|
| <p><i>Section 1 Side effect survey</i></p> <p>Did you have pain at the vaccine injection site (where the vaccine was injected into your arm)?</p> | <p>dropdown- Required</p> <table border="1"> <tr><td>1</td><td>No</td></tr> <tr><td>2</td><td>Mild- did not interfere with doing my usual activities</td></tr> <tr><td>3</td><td>Moderate- slowed me down or made my usual activities more difficult</td></tr> <tr><td>4</td><td>Severe- stopped me doing my usual activities</td></tr> <tr><td>5</td><td>Serious- I needed to attend the emergency department due to pain at the injection site</td></tr> </table> | 1                                                                                                   | No            | 2  | Mild- did not interfere with doing my usual activities | 3             | Moderate- slowed me down or made my usual activities more difficult | 4 | Severe- stopped me doing my usual activities        | 5                                                                                                   | Serious- I needed to attend the emergency department due to pain at the injection site |   |                                                   |
| 1                                                                                                                                                 | No                                                                                                                                                                                                                                                                                                                                                                                                                                                                  |                                                                                                     |               |    |                                                        |               |                                                                     |   |                                                     |                                                                                                     |                                                                                        |   |                                                   |
| 2                                                                                                                                                 | Mild- did not interfere with doing my usual activities                                                                                                                                                                                                                                                                                                                                                                                                              |                                                                                                     |               |    |                                                        |               |                                                                     |   |                                                     |                                                                                                     |                                                                                        |   |                                                   |
| 3                                                                                                                                                 | Moderate- slowed me down or made my usual activities more difficult                                                                                                                                                                                                                                                                                                                                                                                                 |                                                                                                     |               |    |                                                        |               |                                                                     |   |                                                     |                                                                                                     |                                                                                        |   |                                                   |
| 4                                                                                                                                                 | Severe- stopped me doing my usual activities                                                                                                                                                                                                                                                                                                                                                                                                                        |                                                                                                     |               |    |                                                        |               |                                                                     |   |                                                     |                                                                                                     |                                                                                        |   |                                                   |
| 5                                                                                                                                                 | Serious- I needed to attend the emergency department due to pain at the injection site                                                                                                                                                                                                                                                                                                                                                                              |                                                                                                     |               |    |                                                        |               |                                                                     |   |                                                     |                                                                                                     |                                                                                        |   |                                                   |
| <p>Did you have redness or swelling at the injection site?</p>                                                                                    | <p>dropdown</p> <table border="1"> <tr><td>1</td><td>No</td></tr> <tr><td>2</td><td>Minor- 2 to 5cm area of redness or swelling</td></tr> <tr><td>3</td><td>Moderate- 5 to 10cm area of redness or swelling</td></tr> <tr><td>4</td><td>Severe- more than 10cm (most of upper arm affected)</td></tr> <tr><td>5</td><td>Serious- blistering- skin damage or soft tissue damage requiring medical attention</td></tr> </table>                                       | 1                                                                                                   | No            | 2  | Minor- 2 to 5cm area of redness or swelling            | 3             | Moderate- 5 to 10cm area of redness or swelling                     | 4 | Severe- more than 10cm (most of upper arm affected) | 5                                                                                                   | Serious- blistering- skin damage or soft tissue damage requiring medical attention     |   |                                                   |
| 1                                                                                                                                                 | No                                                                                                                                                                                                                                                                                                                                                                                                                                                                  |                                                                                                     |               |    |                                                        |               |                                                                     |   |                                                     |                                                                                                     |                                                                                        |   |                                                   |
| 2                                                                                                                                                 | Minor- 2 to 5cm area of redness or swelling                                                                                                                                                                                                                                                                                                                                                                                                                         |                                                                                                     |               |    |                                                        |               |                                                                     |   |                                                     |                                                                                                     |                                                                                        |   |                                                   |
| 3                                                                                                                                                 | Moderate- 5 to 10cm area of redness or swelling                                                                                                                                                                                                                                                                                                                                                                                                                     |                                                                                                     |               |    |                                                        |               |                                                                     |   |                                                     |                                                                                                     |                                                                                        |   |                                                   |
| 4                                                                                                                                                 | Severe- more than 10cm (most of upper arm affected)                                                                                                                                                                                                                                                                                                                                                                                                                 |                                                                                                     |               |    |                                                        |               |                                                                     |   |                                                     |                                                                                                     |                                                                                        |   |                                                   |
| 5                                                                                                                                                 | Serious- blistering- skin damage or soft tissue damage requiring medical attention                                                                                                                                                                                                                                                                                                                                                                                  |                                                                                                     |               |    |                                                        |               |                                                                     |   |                                                     |                                                                                                     |                                                                                        |   |                                                   |
| <p>Did you have itch at the injection site?</p>                                                                                                   | <p>dropdown- Required</p> <table border="1"> <tr><td>1</td><td>None</td></tr> <tr><td>2</td><td>Mild- barely noticed it</td></tr> <tr><td>3</td><td>Moderate- for example needed to scratch or use cool pack</td></tr> <tr><td>4</td><td>Severe- needed to take medication</td></tr> <tr><td>5</td><td>Very severe- needed to seek medical attention</td></tr> </table>                                                                                             | 1                                                                                                   | None          | 2  | Mild- barely noticed it                                | 3             | Moderate- for example needed to scratch or use cool pack            | 4 | Severe- needed to take medication                   | 5                                                                                                   | Very severe- needed to seek medical attention                                          |   |                                                   |
| 1                                                                                                                                                 | None                                                                                                                                                                                                                                                                                                                                                                                                                                                                |                                                                                                     |               |    |                                                        |               |                                                                     |   |                                                     |                                                                                                     |                                                                                        |   |                                                   |
| 2                                                                                                                                                 | Mild- barely noticed it                                                                                                                                                                                                                                                                                                                                                                                                                                             |                                                                                                     |               |    |                                                        |               |                                                                     |   |                                                     |                                                                                                     |                                                                                        |   |                                                   |
| 3                                                                                                                                                 | Moderate- for example needed to scratch or use cool pack                                                                                                                                                                                                                                                                                                                                                                                                            |                                                                                                     |               |    |                                                        |               |                                                                     |   |                                                     |                                                                                                     |                                                                                        |   |                                                   |
| 4                                                                                                                                                 | Severe- needed to take medication                                                                                                                                                                                                                                                                                                                                                                                                                                   |                                                                                                     |               |    |                                                        |               |                                                                     |   |                                                     |                                                                                                     |                                                                                        |   |                                                   |
| 5                                                                                                                                                 | Very severe- needed to seek medical attention                                                                                                                                                                                                                                                                                                                                                                                                                       |                                                                                                     |               |    |                                                        |               |                                                                     |   |                                                     |                                                                                                     |                                                                                        |   |                                                   |
| <p>Section Header: <i>Section 2</i></p> <p>Have you had a fever (a temperature) after the vaccination?</p>                                        | <p>dropdown</p> <table border="1"> <tr><td>1</td><td>No</td></tr> <tr><td>2</td><td>Yes- I felt feverish but did not take temperature</td></tr> <tr><td>3</td><td>Yes- mild 37.5-37.9 degrees</td></tr> <tr><td>4</td><td>Yes- moderate 38-38.5 degrees</td></tr> <tr><td>5</td><td>Yes- high fever 38.6 degrees or higher</td></tr> <tr><td>6</td><td>Yes- went to hospital for assessment or treatment</td></tr> </table>                                         | 1                                                                                                   | No            | 2  | Yes- I felt feverish but did not take temperature      | 3             | Yes- mild 37.5-37.9 degrees                                         | 4 | Yes- moderate 38-38.5 degrees                       | 5                                                                                                   | Yes- high fever 38.6 degrees or higher                                                 | 6 | Yes- went to hospital for assessment or treatment |
| 1                                                                                                                                                 | No                                                                                                                                                                                                                                                                                                                                                                                                                                                                  |                                                                                                     |               |    |                                                        |               |                                                                     |   |                                                     |                                                                                                     |                                                                                        |   |                                                   |
| 2                                                                                                                                                 | Yes- I felt feverish but did not take temperature                                                                                                                                                                                                                                                                                                                                                                                                                   |                                                                                                     |               |    |                                                        |               |                                                                     |   |                                                     |                                                                                                     |                                                                                        |   |                                                   |
| 3                                                                                                                                                 | Yes- mild 37.5-37.9 degrees                                                                                                                                                                                                                                                                                                                                                                                                                                         |                                                                                                     |               |    |                                                        |               |                                                                     |   |                                                     |                                                                                                     |                                                                                        |   |                                                   |
| 4                                                                                                                                                 | Yes- moderate 38-38.5 degrees                                                                                                                                                                                                                                                                                                                                                                                                                                       |                                                                                                     |               |    |                                                        |               |                                                                     |   |                                                     |                                                                                                     |                                                                                        |   |                                                   |
| 5                                                                                                                                                 | Yes- high fever 38.6 degrees or higher                                                                                                                                                                                                                                                                                                                                                                                                                              |                                                                                                     |               |    |                                                        |               |                                                                     |   |                                                     |                                                                                                     |                                                                                        |   |                                                   |
| 6                                                                                                                                                 | Yes- went to hospital for assessment or treatment                                                                                                                                                                                                                                                                                                                                                                                                                   |                                                                                                     |               |    |                                                        |               |                                                                     |   |                                                     |                                                                                                     |                                                                                        |   |                                                   |
| <p>Did you take any medication to treat side effects after your vaccine?</p>                                                                      | <p>checkbox</p> <table border="1"> <tr> <td>0</td> <td>medication__0</td> <td>No</td> </tr> <tr> <td>1</td> <td>medication__1</td> <td>Yes- paracetamol</td> </tr> <tr> <td>2</td> <td>medication__2</td> <td>Yes - anti inflammatory for example ibuprofen (Nurofen)- diclofenac (Voltaren)- naproxen (Naprosyn)</td> </tr> </table>                                                                                                                               | 0                                                                                                   | medication__0 | No | 1                                                      | medication__1 | Yes- paracetamol                                                    | 2 | medication__2                                       | Yes - anti inflammatory for example ibuprofen (Nurofen)- diclofenac (Voltaren)- naproxen (Naprosyn) |                                                                                        |   |                                                   |
| 0                                                                                                                                                 | medication__0                                                                                                                                                                                                                                                                                                                                                                                                                                                       | No                                                                                                  |               |    |                                                        |               |                                                                     |   |                                                     |                                                                                                     |                                                                                        |   |                                                   |
| 1                                                                                                                                                 | medication__1                                                                                                                                                                                                                                                                                                                                                                                                                                                       | Yes- paracetamol                                                                                    |               |    |                                                        |               |                                                                     |   |                                                     |                                                                                                     |                                                                                        |   |                                                   |
| 2                                                                                                                                                 | medication__2                                                                                                                                                                                                                                                                                                                                                                                                                                                       | Yes - anti inflammatory for example ibuprofen (Nurofen)- diclofenac (Voltaren)- naproxen (Naprosyn) |               |    |                                                        |               |                                                                     |   |                                                     |                                                                                                     |                                                                                        |   |                                                   |

|                                                                                                                                           |                                                                                                                                                                                                                                                               |                                                                                      |               |                                                                                      |              |               |                     |   |             |   |                   |
|-------------------------------------------------------------------------------------------------------------------------------------------|---------------------------------------------------------------------------------------------------------------------------------------------------------------------------------------------------------------------------------------------------------------|--------------------------------------------------------------------------------------|---------------|--------------------------------------------------------------------------------------|--------------|---------------|---------------------|---|-------------|---|-------------------|
|                                                                                                                                           | <table border="1"> <tr> <td>3</td> <td>medication__3</td> <td>Yes- opioid pain killer - oxycodone (Endone)- codeine (Panadeine or Panadeine Forte)</td> </tr> <tr> <td>4</td> <td>medication__4</td> <td>Yes- other- specify</td> </tr> </table>              | 3                                                                                    | medication__3 | Yes- opioid pain killer - oxycodone (Endone)- codeine (Panadeine or Panadeine Forte) | 4            | medication__4 | Yes- other- specify |   |             |   |                   |
| 3                                                                                                                                         | medication__3                                                                                                                                                                                                                                                 | Yes- opioid pain killer - oxycodone (Endone)- codeine (Panadeine or Panadeine Forte) |               |                                                                                      |              |               |                     |   |             |   |                   |
| 4                                                                                                                                         | medication__4                                                                                                                                                                                                                                                 | Yes- other- specify                                                                  |               |                                                                                      |              |               |                     |   |             |   |                   |
| <p>What medication did you take to treat side effects after your vaccine?<br/><i>Please write the name of the medication you used</i></p> | text (alpha_only)                                                                                                                                                                                                                                             |                                                                                      |               |                                                                                      |              |               |                     |   |             |   |                   |
| <p>Did you have new or worsened fatigue since your vaccination?</p>                                                                       | <p>Yes/No- Required</p> <table border="1"> <tr> <td>1</td> <td>Yes</td> </tr> <tr> <td>0</td> <td>No</td> </tr> </table>                                                                                                                                      | 1                                                                                    | Yes           | 0                                                                                    | No           |               |                     |   |             |   |                   |
| 1                                                                                                                                         | Yes                                                                                                                                                                                                                                                           |                                                                                      |               |                                                                                      |              |               |                     |   |             |   |                   |
| 0                                                                                                                                         | No                                                                                                                                                                                                                                                            |                                                                                      |               |                                                                                      |              |               |                     |   |             |   |                   |
| <p>If yes- In the last 7 days- how much did FATIGUE- TIREDNESS- OR LACK OF ENERGY INTERFERE with your usual or daily activities?</p>      | <p>dropdown</p> <table border="1"> <tr> <td>1</td> <td>Not at all</td> </tr> <tr> <td>2</td> <td>A little bit</td> </tr> <tr> <td>3</td> <td>Somewhat</td> </tr> <tr> <td>4</td> <td>Quite a bit</td> </tr> <tr> <td>5</td> <td>Very much</td> </tr> </table> | 1                                                                                    | Not at all    | 2                                                                                    | A little bit | 3             | Somewhat            | 4 | Quite a bit | 5 | Very much         |
| 1                                                                                                                                         | Not at all                                                                                                                                                                                                                                                    |                                                                                      |               |                                                                                      |              |               |                     |   |             |   |                   |
| 2                                                                                                                                         | A little bit                                                                                                                                                                                                                                                  |                                                                                      |               |                                                                                      |              |               |                     |   |             |   |                   |
| 3                                                                                                                                         | Somewhat                                                                                                                                                                                                                                                      |                                                                                      |               |                                                                                      |              |               |                     |   |             |   |                   |
| 4                                                                                                                                         | Quite a bit                                                                                                                                                                                                                                                   |                                                                                      |               |                                                                                      |              |               |                     |   |             |   |                   |
| 5                                                                                                                                         | Very much                                                                                                                                                                                                                                                     |                                                                                      |               |                                                                                      |              |               |                     |   |             |   |                   |
| <p>Did you have new or worsened headache after your vaccination?</p>                                                                      | <p>Yes/No- Required</p> <table border="1"> <tr> <td>1</td> <td>Yes</td> </tr> <tr> <td>0</td> <td>No</td> </tr> </table>                                                                                                                                      | 1                                                                                    | Yes           | 0                                                                                    | No           |               |                     |   |             |   |                   |
| 1                                                                                                                                         | Yes                                                                                                                                                                                                                                                           |                                                                                      |               |                                                                                      |              |               |                     |   |             |   |                   |
| 0                                                                                                                                         | No                                                                                                                                                                                                                                                            |                                                                                      |               |                                                                                      |              |               |                     |   |             |   |                   |
| <p>If yes- In the last 7 days- what was the SEVERITY of your HEADACHE at its WORST?</p>                                                   | <p>dropdown</p> <table border="1"> <tr> <td>1</td> <td>None</td> </tr> <tr> <td>2</td> <td>Mild</td> </tr> <tr> <td>3</td> <td>Moderate</td> </tr> <tr> <td>4</td> <td>Severe</td> </tr> <tr> <td>5</td> <td>Very severe</td> </tr> </table>                  | 1                                                                                    | None          | 2                                                                                    | Mild         | 3             | Moderate            | 4 | Severe      | 5 | Very severe       |
| 1                                                                                                                                         | None                                                                                                                                                                                                                                                          |                                                                                      |               |                                                                                      |              |               |                     |   |             |   |                   |
| 2                                                                                                                                         | Mild                                                                                                                                                                                                                                                          |                                                                                      |               |                                                                                      |              |               |                     |   |             |   |                   |
| 3                                                                                                                                         | Moderate                                                                                                                                                                                                                                                      |                                                                                      |               |                                                                                      |              |               |                     |   |             |   |                   |
| 4                                                                                                                                         | Severe                                                                                                                                                                                                                                                        |                                                                                      |               |                                                                                      |              |               |                     |   |             |   |                   |
| 5                                                                                                                                         | Very severe                                                                                                                                                                                                                                                   |                                                                                      |               |                                                                                      |              |               |                     |   |             |   |                   |
| <p>In the last 7 days- how OFTEN did you have SHIVERING OR SHAKING CHILLS?</p>                                                            | <p>dropdown</p> <table border="1"> <tr> <td>1</td> <td>Never</td> </tr> <tr> <td>2</td> <td>Rarely</td> </tr> <tr> <td>3</td> <td>Occasionally</td> </tr> <tr> <td>4</td> <td>Frequently</td> </tr> <tr> <td>5</td> <td>Almost constantly</td> </tr> </table> | 1                                                                                    | Never         | 2                                                                                    | Rarely       | 3             | Occasionally        | 4 | Frequently  | 5 | Almost constantly |
| 1                                                                                                                                         | Never                                                                                                                                                                                                                                                         |                                                                                      |               |                                                                                      |              |               |                     |   |             |   |                   |
| 2                                                                                                                                         | Rarely                                                                                                                                                                                                                                                        |                                                                                      |               |                                                                                      |              |               |                     |   |             |   |                   |
| 3                                                                                                                                         | Occasionally                                                                                                                                                                                                                                                  |                                                                                      |               |                                                                                      |              |               |                     |   |             |   |                   |
| 4                                                                                                                                         | Frequently                                                                                                                                                                                                                                                    |                                                                                      |               |                                                                                      |              |               |                     |   |             |   |                   |
| 5                                                                                                                                         | Almost constantly                                                                                                                                                                                                                                             |                                                                                      |               |                                                                                      |              |               |                     |   |             |   |                   |
| <p>Did you have new or worsened muscle pain since your vaccine dose?</p>                                                                  | <p>Yes/No</p> <table border="1"> <tr> <td>1</td> <td>Yes</td> </tr> <tr> <td>0</td> <td>No</td> </tr> </table>                                                                                                                                                | 1                                                                                    | Yes           | 0                                                                                    | No           |               |                     |   |             |   |                   |
| 1                                                                                                                                         | Yes                                                                                                                                                                                                                                                           |                                                                                      |               |                                                                                      |              |               |                     |   |             |   |                   |
| 0                                                                                                                                         | No                                                                                                                                                                                                                                                            |                                                                                      |               |                                                                                      |              |               |                     |   |             |   |                   |
| <p>In the last 7 days- what was the SEVERITY of your ACHING MUSCLES at their WORST?</p>                                                   | <p>dropdown</p> <table border="1"> <tr> <td>1</td> <td>None</td> </tr> <tr> <td>2</td> <td>Mild</td> </tr> </table>                                                                                                                                           | 1                                                                                    | None          | 2                                                                                    | Mild         |               |                     |   |             |   |                   |
| 1                                                                                                                                         | None                                                                                                                                                                                                                                                          |                                                                                      |               |                                                                                      |              |               |                     |   |             |   |                   |
| 2                                                                                                                                         | Mild                                                                                                                                                                                                                                                          |                                                                                      |               |                                                                                      |              |               |                     |   |             |   |                   |

|                                                                                                                                                 |                                                                                                                                                                                                                                                |   |            |   |              |   |              |   |             |   |                   |
|-------------------------------------------------------------------------------------------------------------------------------------------------|------------------------------------------------------------------------------------------------------------------------------------------------------------------------------------------------------------------------------------------------|---|------------|---|--------------|---|--------------|---|-------------|---|-------------------|
|                                                                                                                                                 | <table border="1"> <tr><td>3</td><td>Moderate</td></tr> <tr><td>4</td><td>Severe</td></tr> <tr><td>5</td><td>Very severe</td></tr> </table>                                                                                                    | 3 | Moderate   | 4 | Severe       | 5 | Very severe  |   |             |   |                   |
| 3                                                                                                                                               | Moderate                                                                                                                                                                                                                                       |   |            |   |              |   |              |   |             |   |                   |
| 4                                                                                                                                               | Severe                                                                                                                                                                                                                                         |   |            |   |              |   |              |   |             |   |                   |
| 5                                                                                                                                               | Very severe                                                                                                                                                                                                                                    |   |            |   |              |   |              |   |             |   |                   |
| <p>Section Header: <i>Section 3</i></p> <p>Did you have new or worsened joint pain since your vaccination?</p>                                  | <p>Yes/No</p> <table border="1"> <tr><td>1</td><td>Yes</td></tr> <tr><td>0</td><td>No</td></tr> </table>                                                                                                                                       | 1 | Yes        | 0 | No           |   |              |   |             |   |                   |
| 1                                                                                                                                               | Yes                                                                                                                                                                                                                                            |   |            |   |              |   |              |   |             |   |                   |
| 0                                                                                                                                               | No                                                                                                                                                                                                                                             |   |            |   |              |   |              |   |             |   |                   |
| <p>If yes- In the last 7 days- how much did ACHING JOINTS (SUCH AS ELBOWS- KNEES- SHOULDERS) INTERFERE with your usual or daily activities?</p> | <p>dropdown</p> <table border="1"> <tr><td>1</td><td>Not at all</td></tr> <tr><td>2</td><td>A little bit</td></tr> <tr><td>3</td><td>Somewhat</td></tr> <tr><td>4</td><td>Quite a bit</td></tr> <tr><td>5</td><td>Very much</td></tr> </table> | 1 | Not at all | 2 | A little bit | 3 | Somewhat     | 4 | Quite a bit | 5 | Very much         |
| 1                                                                                                                                               | Not at all                                                                                                                                                                                                                                     |   |            |   |              |   |              |   |             |   |                   |
| 2                                                                                                                                               | A little bit                                                                                                                                                                                                                                   |   |            |   |              |   |              |   |             |   |                   |
| 3                                                                                                                                               | Somewhat                                                                                                                                                                                                                                       |   |            |   |              |   |              |   |             |   |                   |
| 4                                                                                                                                               | Quite a bit                                                                                                                                                                                                                                    |   |            |   |              |   |              |   |             |   |                   |
| 5                                                                                                                                               | Very much                                                                                                                                                                                                                                      |   |            |   |              |   |              |   |             |   |                   |
| <p>Did you have new or worsened nausea since your vaccination?</p>                                                                              | <p>Yes/No</p> <table border="1"> <tr><td>1</td><td>Yes</td></tr> <tr><td>0</td><td>No</td></tr> </table>                                                                                                                                       | 1 | Yes        | 0 | No           |   |              |   |             |   |                   |
| 1                                                                                                                                               | Yes                                                                                                                                                                                                                                            |   |            |   |              |   |              |   |             |   |                   |
| 0                                                                                                                                               | No                                                                                                                                                                                                                                             |   |            |   |              |   |              |   |             |   |                   |
| <p>In the last 7 days- how OFTEN did you have NAUSEA?</p>                                                                                       | <p>dropdown</p> <table border="1"> <tr><td>1</td><td>Never</td></tr> <tr><td>2</td><td>Rarely</td></tr> <tr><td>3</td><td>Occasionally</td></tr> <tr><td>4</td><td>Frequently</td></tr> <tr><td>5</td><td>Almost constantly</td></tr> </table> | 1 | Never      | 2 | Rarely       | 3 | Occasionally | 4 | Frequently  | 5 | Almost constantly |
| 1                                                                                                                                               | Never                                                                                                                                                                                                                                          |   |            |   |              |   |              |   |             |   |                   |
| 2                                                                                                                                               | Rarely                                                                                                                                                                                                                                         |   |            |   |              |   |              |   |             |   |                   |
| 3                                                                                                                                               | Occasionally                                                                                                                                                                                                                                   |   |            |   |              |   |              |   |             |   |                   |
| 4                                                                                                                                               | Frequently                                                                                                                                                                                                                                     |   |            |   |              |   |              |   |             |   |                   |
| 5                                                                                                                                               | Almost constantly                                                                                                                                                                                                                              |   |            |   |              |   |              |   |             |   |                   |
| <p>In the last 7 days- what was the SEVERITY of your NAUSEA at its WORST?</p>                                                                   | <p>dropdown</p> <table border="1"> <tr><td>1</td><td>None</td></tr> <tr><td>2</td><td>Mild</td></tr> <tr><td>3</td><td>Moderate</td></tr> <tr><td>4</td><td>Severe</td></tr> <tr><td>5</td><td>Very severe</td></tr> </table>                  | 1 | None       | 2 | Mild         | 3 | Moderate     | 4 | Severe      | 5 | Very severe       |
| 1                                                                                                                                               | None                                                                                                                                                                                                                                           |   |            |   |              |   |              |   |             |   |                   |
| 2                                                                                                                                               | Mild                                                                                                                                                                                                                                           |   |            |   |              |   |              |   |             |   |                   |
| 3                                                                                                                                               | Moderate                                                                                                                                                                                                                                       |   |            |   |              |   |              |   |             |   |                   |
| 4                                                                                                                                               | Severe                                                                                                                                                                                                                                         |   |            |   |              |   |              |   |             |   |                   |
| 5                                                                                                                                               | Very severe                                                                                                                                                                                                                                    |   |            |   |              |   |              |   |             |   |                   |
| <p>Did you have new or worsened vomiting since your vaccination?</p>                                                                            | <p>Yes/No</p> <table border="1"> <tr><td>1</td><td>Yes</td></tr> <tr><td>0</td><td>No</td></tr> </table>                                                                                                                                       | 1 | Yes        | 0 | No           |   |              |   |             |   |                   |
| 1                                                                                                                                               | Yes                                                                                                                                                                                                                                            |   |            |   |              |   |              |   |             |   |                   |
| 0                                                                                                                                               | No                                                                                                                                                                                                                                             |   |            |   |              |   |              |   |             |   |                   |
| <p>In the last 7 days- what was the SEVERITY of your VOMITING at its WORST?</p>                                                                 | <p>dropdown</p> <table border="1"> <tr><td>1</td><td>None</td></tr> <tr><td>2</td><td>Mild</td></tr> <tr><td>3</td><td>Moderate</td></tr> <tr><td>4</td><td>Severe</td></tr> <tr><td>5</td><td>Very severe</td></tr> </table>                  | 1 | None       | 2 | Mild         | 3 | Moderate     | 4 | Severe      | 5 | Very severe       |
| 1                                                                                                                                               | None                                                                                                                                                                                                                                           |   |            |   |              |   |              |   |             |   |                   |
| 2                                                                                                                                               | Mild                                                                                                                                                                                                                                           |   |            |   |              |   |              |   |             |   |                   |
| 3                                                                                                                                               | Moderate                                                                                                                                                                                                                                       |   |            |   |              |   |              |   |             |   |                   |
| 4                                                                                                                                               | Severe                                                                                                                                                                                                                                         |   |            |   |              |   |              |   |             |   |                   |
| 5                                                                                                                                               | Very severe                                                                                                                                                                                                                                    |   |            |   |              |   |              |   |             |   |                   |



|                                                                                                                     |                                                                                                                                                                                                                                                                                                                                                                                                                                    |   |                                                                                               |   |                                                                 |   |                                            |   |                                                                                                      |   |                                        |
|---------------------------------------------------------------------------------------------------------------------|------------------------------------------------------------------------------------------------------------------------------------------------------------------------------------------------------------------------------------------------------------------------------------------------------------------------------------------------------------------------------------------------------------------------------------|---|-----------------------------------------------------------------------------------------------|---|-----------------------------------------------------------------|---|--------------------------------------------|---|------------------------------------------------------------------------------------------------------|---|----------------------------------------|
| Did you have new or worsened diarrhoea since your vaccination?                                                      | Yes/No- Required<br><table border="1" data-bbox="697 232 863 329"> <tr> <td>1</td> <td>Yes</td> </tr> <tr> <td>0</td> <td>No</td> </tr> </table>                                                                                                                                                                                                                                                                                   | 1 | Yes                                                                                           | 0 | No                                                              |   |                                            |   |                                                                                                      |   |                                        |
| 1                                                                                                                   | Yes                                                                                                                                                                                                                                                                                                                                                                                                                                |   |                                                                                               |   |                                                                 |   |                                            |   |                                                                                                      |   |                                        |
| 0                                                                                                                   | No                                                                                                                                                                                                                                                                                                                                                                                                                                 |   |                                                                                               |   |                                                                 |   |                                            |   |                                                                                                      |   |                                        |
| In the last 7 days- how OFTEN did you have LOOSE OR WATERY STOOLS (DIARRHOEA)?                                      | dropdown<br><table border="1" data-bbox="697 383 986 622"> <tr> <td>1</td> <td>Never</td> </tr> <tr> <td>2</td> <td>Rarely</td> </tr> <tr> <td>3</td> <td>Occasionally</td> </tr> <tr> <td>4</td> <td>Frequently</td> </tr> <tr> <td>5</td> <td>Almost constantly</td> </tr> </table>                                                                                                                                              | 1 | Never                                                                                         | 2 | Rarely                                                          | 3 | Occasionally                               | 4 | Frequently                                                                                           | 5 | Almost constantly                      |
| 1                                                                                                                   | Never                                                                                                                                                                                                                                                                                                                                                                                                                              |   |                                                                                               |   |                                                                 |   |                                            |   |                                                                                                      |   |                                        |
| 2                                                                                                                   | Rarely                                                                                                                                                                                                                                                                                                                                                                                                                             |   |                                                                                               |   |                                                                 |   |                                            |   |                                                                                                      |   |                                        |
| 3                                                                                                                   | Occasionally                                                                                                                                                                                                                                                                                                                                                                                                                       |   |                                                                                               |   |                                                                 |   |                                            |   |                                                                                                      |   |                                        |
| 4                                                                                                                   | Frequently                                                                                                                                                                                                                                                                                                                                                                                                                         |   |                                                                                               |   |                                                                 |   |                                            |   |                                                                                                      |   |                                        |
| 5                                                                                                                   | Almost constantly                                                                                                                                                                                                                                                                                                                                                                                                                  |   |                                                                                               |   |                                                                 |   |                                            |   |                                                                                                      |   |                                        |
| How severe was your diarrhoea?                                                                                      | dropdown<br><table border="1" data-bbox="697 674 1393 896"> <tr> <td>1</td> <td>Mild: 2 to 3 loose stools in 24 hours</td> </tr> <tr> <td>2</td> <td>Moderate: 4 to 5 loose stools in 24 hours</td> </tr> <tr> <td>3</td> <td>Severe: 6 or more loose stools in 24 hours</td> </tr> <tr> <td>4</td> <td>Very severe: I needed to attend the emergency department or I was admitted to hospital for diarrhoea</td> </tr> </table>   | 1 | Mild: 2 to 3 loose stools in 24 hours                                                         | 2 | Moderate: 4 to 5 loose stools in 24 hours                       | 3 | Severe: 6 or more loose stools in 24 hours | 4 | Very severe: I needed to attend the emergency department or I was admitted to hospital for diarrhoea |   |                                        |
| 1                                                                                                                   | Mild: 2 to 3 loose stools in 24 hours                                                                                                                                                                                                                                                                                                                                                                                              |   |                                                                                               |   |                                                                 |   |                                            |   |                                                                                                      |   |                                        |
| 2                                                                                                                   | Moderate: 4 to 5 loose stools in 24 hours                                                                                                                                                                                                                                                                                                                                                                                          |   |                                                                                               |   |                                                                 |   |                                            |   |                                                                                                      |   |                                        |
| 3                                                                                                                   | Severe: 6 or more loose stools in 24 hours                                                                                                                                                                                                                                                                                                                                                                                         |   |                                                                                               |   |                                                                 |   |                                            |   |                                                                                                      |   |                                        |
| 4                                                                                                                   | Very severe: I needed to attend the emergency department or I was admitted to hospital for diarrhoea                                                                                                                                                                                                                                                                                                                               |   |                                                                                               |   |                                                                 |   |                                            |   |                                                                                                      |   |                                        |
| Section Header: <i>Section 4</i><br>Have you had to delay or stop your anticancer treatment since your vaccination? | Yes/No<br><table border="1" data-bbox="697 947 831 1043"> <tr> <td>1</td> <td>Yes</td> </tr> <tr> <td>0</td> <td>No</td> </tr> </table>                                                                                                                                                                                                                                                                                            | 1 | Yes                                                                                           | 0 | No                                                              |   |                                            |   |                                                                                                      |   |                                        |
| 1                                                                                                                   | Yes                                                                                                                                                                                                                                                                                                                                                                                                                                |   |                                                                                               |   |                                                                 |   |                                            |   |                                                                                                      |   |                                        |
| 0                                                                                                                   | No                                                                                                                                                                                                                                                                                                                                                                                                                                 |   |                                                                                               |   |                                                                 |   |                                            |   |                                                                                                      |   |                                        |
| Have you attended the emergency department since your vaccination?                                                  | dropdown<br><table border="1" data-bbox="697 1099 1393 1373"> <tr> <td>0</td> <td>No</td> </tr> <tr> <td>1</td> <td>Yes (Monash Health: Clayton- Dandenong or Casey Emergency Dept)</td> </tr> <tr> <td>3</td> <td>Yes (Westmead Hospital)</td> </tr> <tr> <td>4</td> <td>Yes (Sydney Children's Hospital)</td> </tr> <tr> <td>2</td> <td>Yes (other site- please specify where)</td> </tr> </table>                               | 0 | No                                                                                            | 1 | Yes (Monash Health: Clayton- Dandenong or Casey Emergency Dept) | 3 | Yes (Westmead Hospital)                    | 4 | Yes (Sydney Children's Hospital)                                                                     | 2 | Yes (other site- please specify where) |
| 0                                                                                                                   | No                                                                                                                                                                                                                                                                                                                                                                                                                                 |   |                                                                                               |   |                                                                 |   |                                            |   |                                                                                                      |   |                                        |
| 1                                                                                                                   | Yes (Monash Health: Clayton- Dandenong or Casey Emergency Dept)                                                                                                                                                                                                                                                                                                                                                                    |   |                                                                                               |   |                                                                 |   |                                            |   |                                                                                                      |   |                                        |
| 3                                                                                                                   | Yes (Westmead Hospital)                                                                                                                                                                                                                                                                                                                                                                                                            |   |                                                                                               |   |                                                                 |   |                                            |   |                                                                                                      |   |                                        |
| 4                                                                                                                   | Yes (Sydney Children's Hospital)                                                                                                                                                                                                                                                                                                                                                                                                   |   |                                                                                               |   |                                                                 |   |                                            |   |                                                                                                      |   |                                        |
| 2                                                                                                                   | Yes (other site- please specify where)                                                                                                                                                                                                                                                                                                                                                                                             |   |                                                                                               |   |                                                                 |   |                                            |   |                                                                                                      |   |                                        |
| Which emergency department did you attend?                                                                          | text (alpha_only)                                                                                                                                                                                                                                                                                                                                                                                                                  |   |                                                                                               |   |                                                                 |   |                                            |   |                                                                                                      |   |                                        |
| Have you been admitted to hospital for any reason since your vaccination?                                           | dropdown<br><table border="1" data-bbox="697 1507 1393 1780"> <tr> <td>1</td> <td>Yes (Monash Health: Clayton (Monash Medical Centre)- Dandenong - Casey- Moorabbin- Kingston))</td> </tr> <tr> <td>4</td> <td>Yes (Westmead Hospital)</td> </tr> <tr> <td>5</td> <td>Yes (Sydney Children's Hospital)</td> </tr> <tr> <td>2</td> <td>Yes (other site- please specify where)</td> </tr> <tr> <td>3</td> <td>No</td> </tr> </table> | 1 | Yes (Monash Health: Clayton (Monash Medical Centre)- Dandenong - Casey- Moorabbin- Kingston)) | 4 | Yes (Westmead Hospital)                                         | 5 | Yes (Sydney Children's Hospital)           | 2 | Yes (other site- please specify where)                                                               | 3 | No                                     |
| 1                                                                                                                   | Yes (Monash Health: Clayton (Monash Medical Centre)- Dandenong - Casey- Moorabbin- Kingston))                                                                                                                                                                                                                                                                                                                                      |   |                                                                                               |   |                                                                 |   |                                            |   |                                                                                                      |   |                                        |
| 4                                                                                                                   | Yes (Westmead Hospital)                                                                                                                                                                                                                                                                                                                                                                                                            |   |                                                                                               |   |                                                                 |   |                                            |   |                                                                                                      |   |                                        |
| 5                                                                                                                   | Yes (Sydney Children's Hospital)                                                                                                                                                                                                                                                                                                                                                                                                   |   |                                                                                               |   |                                                                 |   |                                            |   |                                                                                                      |   |                                        |
| 2                                                                                                                   | Yes (other site- please specify where)                                                                                                                                                                                                                                                                                                                                                                                             |   |                                                                                               |   |                                                                 |   |                                            |   |                                                                                                      |   |                                        |
| 3                                                                                                                   | No                                                                                                                                                                                                                                                                                                                                                                                                                                 |   |                                                                                               |   |                                                                 |   |                                            |   |                                                                                                      |   |                                        |
| Which hospital were you admitted to?                                                                                | text (alpha_only)                                                                                                                                                                                                                                                                                                                                                                                                                  |   |                                                                                               |   |                                                                 |   |                                            |   |                                                                                                      |   |                                        |
| Have you started new treatment for a blood clot since your vaccination?                                             | Yes/No- Required<br><table border="1" data-bbox="697 1879 850 1975"> <tr> <td>1</td> <td>Yes</td> </tr> <tr> <td>0</td> <td>No</td> </tr> </table>                                                                                                                                                                                                                                                                                 | 1 | Yes                                                                                           | 0 | No                                                              |   |                                            |   |                                                                                                      |   |                                        |
| 1                                                                                                                   | Yes                                                                                                                                                                                                                                                                                                                                                                                                                                |   |                                                                                               |   |                                                                 |   |                                            |   |                                                                                                      |   |                                        |
| 0                                                                                                                   | No                                                                                                                                                                                                                                                                                                                                                                                                                                 |   |                                                                                               |   |                                                                 |   |                                            |   |                                                                                                      |   |                                        |

|                                                                                                                                 |                                                                                                                                                                                                                                                                                                                                                                                                                     |   |                                    |   |                                     |   |    |
|---------------------------------------------------------------------------------------------------------------------------------|---------------------------------------------------------------------------------------------------------------------------------------------------------------------------------------------------------------------------------------------------------------------------------------------------------------------------------------------------------------------------------------------------------------------|---|------------------------------------|---|-------------------------------------|---|----|
| Have you needed to see your local doctor since vaccination?                                                                     | dropdown <table border="1" data-bbox="697 232 1201 378"> <tr> <td data-bbox="697 232 735 280">1</td> <td data-bbox="742 232 1201 280">Yes- routine check or prescription</td> </tr> <tr> <td data-bbox="697 288 735 336">2</td> <td data-bbox="742 288 1201 336">Yes - unwell (please specify issue)</td> </tr> <tr> <td data-bbox="697 344 735 378">3</td> <td data-bbox="742 344 1201 378">No</td> </tr> </table> | 1 | Yes- routine check or prescription | 2 | Yes - unwell (please specify issue) | 3 | No |
| 1                                                                                                                               | Yes- routine check or prescription                                                                                                                                                                                                                                                                                                                                                                                  |   |                                    |   |                                     |   |    |
| 2                                                                                                                               | Yes - unwell (please specify issue)                                                                                                                                                                                                                                                                                                                                                                                 |   |                                    |   |                                     |   |    |
| 3                                                                                                                               | No                                                                                                                                                                                                                                                                                                                                                                                                                  |   |                                    |   |                                     |   |    |
| Why did you see your local doctor?                                                                                              | text                                                                                                                                                                                                                                                                                                                                                                                                                |   |                                    |   |                                     |   |    |
| Please describe any other side effect you had which has not been covered in the survey. Leave blank if nothing you need to add. | text                                                                                                                                                                                                                                                                                                                                                                                                                |   |                                    |   |                                     |   |    |

CAPITAL letters used for emphasis; capitalisation as per published PRO-CTCAE questionnaire item formatting.
