# Supplementary material for: Vaccine beliefs, adverse effects, and quality of life in patients with cancer undergoing routine COVID-19 vaccination
Source: bioRxiv or medRxiv preprint supplement (doi:10.1101/2024.06.02.24308345), 2024-06-03
Supplement: Supplementary file [file media-3.pdf]

## Appendix 3. Results

### Contents

|                                                                                                                                             |    |
|---------------------------------------------------------------------------------------------------------------------------------------------|----|
| 3a Proportion of patients responding to each survey .....                                                                                   | 2  |
| 3b Vaccine related beliefs- Oxford Complacency and Confidence Scale- Adults .....                                                           | 3  |
| 3c Vaccine related beliefs- Oxford Complacency and Confidence Scale- Children .....                                                         | 4  |
| 3d Grade and attribution of investigator-reported Serious Adverse Events .....                                                              | 5  |
| 3e Investigator-determined attribution of Serious Adverse Events.....                                                                       | 6  |
| 3f Category of Participant reported adverse events .....                                                                                    | 7  |
| 3g Specific Participant reported adverse events .....                                                                                       | 8  |
| 3h Association of worst patient reported adverse event with receipt of 3 <sup>rd</sup> vaccine dose... 12                                   |    |
| 3i Investigator- reported adverse events by vaccine type (this is way too long and explanations are better below table- already there)..... | 13 |
| 3j Serious Adverse Events by vaccine type .....                                                                                             | 15 |
| 3k Participant-reported adverse effects by vaccine type .....                                                                               | 17 |
| 3l Impact of sequential vaccine doses on health-related quality of life in adults .....                                                     | 20 |
| 3m Impact of sequential doses on health-related quality of life in children.....                                                            | 22 |
| 3n Baseline health-related quality of life and vaccine related beliefs.....                                                                 | 25 |

### 3a Proportion of patients responding to each survey

Surveys were issued as per schedule in Figure 1.

| Activity completed     | Adults<br>N=392 | Children (5-19yrs)*<br>N=107 |
|------------------------|-----------------|------------------------------|
| <b>Dose 1</b>          |                 |                              |
| Received dose          | 392             | 107                          |
| Pre-dose QLQ-C30       | 379             | 4                            |
| Pre-dose PedsQL        | N/A             | 45                           |
| Pre-dose PedsQL proxy  | N/A             | 54                           |
| Vaccine beliefs        | 387             | 56                           |
| Parent vaccine beliefs | N/A             | 58                           |
| Post-dose QLQ-C30      | 368             | 4                            |
| Post-dose PedsQL       | N/A             | 39                           |
| Post-dose PedsQL proxy | N/A             | 55                           |
| Patient-reported AEs   | 371             | 54                           |
| <b>Dose 2</b>          |                 |                              |
| Received dose          | 383             | 104                          |
| Pre-dose QLQ-C30       | 369             | 5                            |
| Pre-dose PedsQL        | N/A             | 45                           |
| Pre-dose PedsQL proxy  | N/A             | 50                           |
| Post-dose QLQ-C30      | 362             | 4                            |
| Post-dose PedsQL       | N/A             | 32                           |
| Post-dose PedsQL proxy | N/A             | 46                           |
| Patient-reported AEs   | 367             | 28                           |
| <b>Dose 3</b>          |                 |                              |
| Received dose          | 320             | 79                           |
| Vaccine beliefs        | 318             | 3                            |
| Parent vaccine beliefs | N/A             | 0                            |
| Post-dose QLQ-C30      | 281             | 4                            |
| Post-dose PedsQL       | N/A             | 19                           |
| Post-dose PedsQL proxy | N/A             | 29                           |
| Patient-reported AEs   | 288             | 27                           |
| <b>Follow-up</b>       |                 |                              |
| Follow-up QLQ-C30      | 312             | 3                            |
| Follow-up PedsQL       | N/A             | 38                           |
| Follow-up PedsQL proxy | N/A             | 0                            |
| Medical record review  | 388             | 104                          |

N = number; N/A = not applicable

\* 18 and 19 year-olds received either QLQ-C30 or PedsQL questionnaires depending if enrolled at an adult or children's cancer centre.

### 3b Vaccine related beliefs- Oxford Complacency and Confidence Scale- Adults

|                             | Dose 1 (N = 387)   | Dose 3 (N = 318)   |
|-----------------------------|--------------------|--------------------|
| <b>Importance</b>           |                    |                    |
| N                           | 357                | 269                |
| Mean (SD)                   | 17.0 (10.6)        | 18.4 (12.6)        |
| Median (IQR)                | 15.0 (10.0 - 25.0) | 18.8 (10.0 - 25.0) |
| Unknown (%)                 | 30 (8)             | 49 (15)            |
| <b>Efficacy</b>             |                    |                    |
| N                           | 336                | 267                |
| Mean (SD)                   | 37.2 (13.7)        | 36.5 (14.3)        |
| Median (IQR)                | 37.5 (33.3 - 50.0) | 37.5 (25.0 - 50.0) |
| Unknown (%)                 | 51 (13)            | 51 (16)            |
| <b>Speed of development</b> |                    |                    |
| N                           | 296                | 0                  |
| Mean (SD)                   | 24.0 (16.0)        | N/A                |
| Median (IQR)                | 25.0 (12.5 - 33.3) | N/A                |
| Unknown (%)                 | 91 (24)            | N/A                |
| <b>Side effects</b>         |                    |                    |
| N                           | 353                | 277                |
| Mean (SD)                   | 21.0 (14.6)        | 19.4 (16.1)        |
| Median (IQR)                | 16.7 (8.3 - 25.0)  | 16.7 (8.3 - 25.0)  |
| Unknown (%)                 | 34 (9)             | 41 (13)            |
| <b>Total score</b>          |                    |                    |
| N                           | 255                | 0                  |
| Mean (SD)                   | 24.0 (9.3)         | N/A                |
| Median (IQR)                | 23.8 (18.0 - 28.9) | N/A                |
| Unknown (%)                 | 132 (34)           | N/A                |
| <b>Total score*</b>         |                    |                    |
| N                           | 309                | 234                |
| Mean (SD)                   | 24.7 (9.5)         | 23.9 (10.3)        |
| Median (IQR)                | 23.9 (18.9 - 30.0) | 22.8 (17.2 - 29.2) |
| Unknown (%)                 | 78 (20)            | 84 (26)            |

N = number N/A = not applicable at this timepoint; SD= Standard Deviation; IQR= Interquartile Range

\*excluded question regarding speed of vaccine development

### 3c Vaccine related beliefs- Oxford Complacency and Confidence Scale- Children

|                             | Patient-reported (N = 56) | Parent-reported (N = 58) |
|-----------------------------|---------------------------|--------------------------|
| <b>Importance</b>           |                           |                          |
| N                           | 53                        | 56                       |
| Mean (SD)                   | 16.8 (9.4)                | 16.3 (10.2)              |
| Median (IQR)                | 15.0 (10.0 - 25.0)        | 15.0 (10.0 - 25.0)       |
| Unknown (%)                 | 3 (5)                     | 2 (3)                    |
| <b>Efficacy</b>             |                           |                          |
| N                           | 51                        | 57                       |
| Mean (SD)                   | 35.3 (14.4)               | 31.9 (12.5)              |
| Median (IQR)                | 37.5 (25.0 - 50.0)        | 33.3 (25.0 - 41.7)       |
| Unknown (%)                 | 5 (9)                     | 1 (2)                    |
| <b>Speed of development</b> |                           |                          |
| N                           | 43                        | 47                       |
| Mean (SD)                   | 26.2 (15.9)               | 31.0 (16.7)              |
| Median (IQR)                | 25.0 (16.7 - 33.3)        | 33.3 (16.7 - 50.0)       |
| Unknown (%)                 | 13 (23)                   | 11 (19)                  |
| <b>Side effects</b>         |                           |                          |
| N                           | 50                        | 56                       |
| Mean (SD)                   | 20.9 (13.0)               | 20.8 (11.6)              |
| Median (IQR)                | 16.7 (12.5 - 25.0)        | 16.7 (16.7 - 25.0)       |
| Unknown (%)                 | 6 (11)                    | 2 (3)                    |
| <b>Total score</b>          |                           |                          |
| N                           | 40                        | 47                       |
| Mean (SD)                   | 24.0 (8.0)                | 25.0 (8.7)               |
| Median (IQR)                | 23.5 (18.2 - 29.2)        | 24.6 (20.8 - 28.9)       |
| Unknown (%)                 | 16 (29)                   | 11 (19)                  |
| <b>Total score*</b>         |                           |                          |
| N                           | 49                        | 56                       |
| Mean (SD)                   | 24.1 (8.2)                | 22.9 (8.6)               |
| Median (IQR)                | 23.3 (18.9 - 27.8)        | 21.8 (16.9 - 26.8)       |
| Unknown (%)                 | 7 (12)                    | 2 (3)                    |

N = number N/A = not applicable at this timepoint; SD = Standard Deviation; IQR= Interquartile Range

\*excluded question regarding speed of vaccine development

### 3d Grade and attribution of investigator-reported Serious Adverse Events

Serious adverse events (SAEs) recorded from medical record reviews were graded according to Common Terminology Criteria for Adverse Events (CTCAE) Version 5.0.

|                                | Adults n (%- 95% CI) |                 | Children n (%- 95% CI) |                |
|--------------------------------|----------------------|-----------------|------------------------|----------------|
|                                | Dose 1-2*            | Dose 3**        | Dose 1-2*              | Dose 3**       |
| <b>Any SAE</b>                 |                      |                 |                        |                |
| No                             | 337 (88; 85-91)      | 295 (97; 95-99) | 71 (70; 60-78)         | 51 (81; 69-90) |
| Yes                            | 45 (12; 9-15)        | 8 (3; 1-5)      | 31 (30; 22-40)         | 12 (19; 10-31) |
| <b>Number of SAE</b>           |                      |                 |                        |                |
| 0                              | 337 (88; 85-91)      | 295 (97; 95-99) | 71 (70; 60-78)         | 51 (81; 69-90) |
| 1                              | 31 (8; 6-11)         | 7 (2; 1-5)      | 20 (20; 12-29)         | 10 (16; 8-27)  |
| 2                              | 11 (3; 1-5)          | 1 (0; 0-2)      | 8 (8; 3-15)            | 2 (3; 0-11)    |
| 3                              | 2 (1; 0-2)           | 0               | 2 (2; 0-7)             | 0              |
| 4+                             | 1 (0; 0-1)           | 0               | 1 (1; 0-5)             | 0              |
| <b>Worst grade</b>             |                      |                 |                        |                |
| 1                              | 3 (1; 0-2)           | 0 (0; 0-1)      | 4 (4; 1-10)            | 6 (10; 4-20)   |
| 2                              | 6 (2; 1-3)           | 0 (0; 0-1)      | 3 (3; 1-8)             | 4 (6; 2-15)    |
| 3                              | 32 (8; 6-12)         | 8 (3; 1-5)      | 21 (21; 13-30)         | 2 (3; 0-11)    |
| 4                              | 2 (1; 0-2)           | 0 (0; 0-1)      | 2 (2; 0-7)             | 0              |
| 5                              | 2 (1; 0-2)           | 0               | 0                      | 0              |
| <b>Attributable to vaccine</b> |                      |                 |                        |                |
| Unlikely                       | 41 (11; 8-14)        | 8 (3; 1-5)      | 17 (17; 10-25)         | 6 (10; 4-20)   |
| Possible                       | 4 (1; 0-3)           | 0 (0; 0-1)      | 14 (14; 8-22)          | 3 (5; 1-13)    |
| Attributed                     | 0                    | 0               | 0                      | 3 (5; 1-13)    |

Time period relates to \*dose 1 until one month post-dose 2 and \*\*dose 3 until one month after.

SAE = Serious Adverse Event; N = number; CI = confidence interval

### 3e Investigator-determined attribution of Serious Adverse Events

|                                          | Adults | Children |
|------------------------------------------|--------|----------|
| <b>Definitely or very likely related</b> |        |          |
| Fever                                    | 0      | 2        |
| Headache                                 | 0      | 1        |
| <b>Possibly related</b>                  |        |          |
| Fever                                    | 1      | 20       |
| Mucositis                                | 0      | 2        |
| Rash                                     | 1      | 0        |
| Upper respiratory symptoms               | 1      | 0        |
| Pulmonary embolism                       | 1*     | 0        |
| Stroke                                   | 1*     | 0        |

\* Same participant, who suffered pulmonary embolism 5 days post initial BNT162b2 vaccine then an ischemic stroke 7 days later, in the context of untreated malignancy and intercurrent pneumonia.

*Note: One adult with comorbid ischaemic heart disease had a fatal myocardial infarction six weeks after the second BNT162b2 dose, outside the window for SAE reporting.*

### 3f Category of Participant reported adverse events

Participant reported adverse events (AE) were recorded according to selected questions from PROCTCAE (Appendix 1c).

| Dose                                             | Adults    |             | Children |            |
|--------------------------------------------------|-----------|-------------|----------|------------|
|                                                  | n* / N    | % (95% CI)  | n / N    | % (95% CI) |
| <b>Local side effect (at injection site)</b>     |           |             |          |            |
| Dose 1                                           | 240 / 369 | 65 (60-70)  | 46 / 54  | 85 (73-93) |
| 2                                                | 245 / 365 | 67 (62-72)  | 19 / 28  | 68 (48-84) |
| 3                                                | 196 / 286 | 69 (63- 74) | 21 / 27  | 78 (58-91) |
| <b>Systemic side effect</b>                      |           |             |          |            |
| Dose 1                                           | 178 / 353 | 50 (45-56)  | 26 / 50  | 52 (37-66) |
| 2                                                | 217 / 351 | 62 (57-67)  | 16 / 27  | 59 (39-78) |
| 3                                                | 159 / 273 | 58 (52-64)  | 14 / 26  | 54 (33-73) |
| <b>Other side effect or adverse event</b>        |           |             |          |            |
| Dose 1                                           | 108 / 371 | 29 (25-34)  | 18 / 54  | 33 (21-47) |
| 2                                                | 117 / 366 | 32 (27-37)  | 8 / 28   | 29 (13-49) |
| 3                                                | 102 / 288 | 35 (30-41)  | 10 / 26  | 38 (20-59) |
| <b>Healthcare utilisation**</b>                  |           |             |          |            |
| Dose 1                                           | 29 / 315  | 9 (6-13)    | 13 / 53  | 25 (14-38) |
| 2                                                | 35 / 347  | 10 (7-14)   | 2 / 26   | 8 (1- 25)  |
| 3                                                | 17 / 274  | 6 (4-10)    | 8 / 26   | 31 (14-52) |
| <b>Delay or interruption to cancer treatment</b> |           |             |          |            |
| Dose 1                                           | 6 / 370   | 2 (1-3)     | 4 / 54   | 7 (2-18)   |
| 2                                                | 14 / 365  | 4 (2-6)     | 0 / 27   | 0 (0-13)   |
| 3                                                | 6 / 288   | 2 (1-4)     | 1 / 26   | 4 (0-20)   |

\*n= number reporting an adverse effect; N=total number of respondents at timepoint; CI = Confidence Interval

\*\*unscheduled visit to doctor or hospital

### 3g Specific Participant reported adverse events

|                                              | Dose   | Adults    |             | Children |             |
|----------------------------------------------|--------|-----------|-------------|----------|-------------|
|                                              |        | n/N       | % (95% CI)  | n/N      | % (95% CI)  |
| <b>Pain at injection site</b>                |        |           |             |          |             |
|                                              | Dose 1 | 224 / 371 | 60 (55- 65) | 45 / 54  | 83 (71- 92) |
|                                              | 2      | 229 / 367 | 62 (57- 67) | 17 / 28  | 61 (41- 78) |
|                                              | 3      | 180 / 288 | 62 (57- 68) | 20 / 27  | 74 (54- 89) |
| <b>Medication for side effects</b>           |        |           |             |          |             |
|                                              | Dose 1 | 105 / 371 | 28 (24- 33) | 17 / 54  | 31 (20- 46) |
|                                              | 2      | 116 / 367 | 32 (27- 37) | 8 / 28   | 29 (13- 49) |
|                                              | 3      | 100 / 288 | 35 (29- 41) | 10 / 27  | 37 (19- 58) |
| <b>Fatigue</b>                               |        |           |             |          |             |
|                                              | Dose 1 | 75 / 371  | 20 (16- 25) | 11 / 54  | 20 (11- 34) |
|                                              | 2      | 114 / 367 | 31 (26- 36) | 12 / 28  | 43 (24- 63) |
|                                              | 3      | 83 / 288  | 29 (24- 34) | 7 / 26   | 27 (12- 48) |
| <b>Muscle pain</b>                           |        |           |             |          |             |
|                                              | Dose 1 | 56 / 367  | 15 (12- 19) | 9 / 53   | 17 (8- 30)  |
|                                              | 2      | 87 / 363  | 24 (20- 29) | 5 / 28   | 18 (6- 37)  |
|                                              | 3      | 72 / 283  | 25 (20- 31) | 4 / 26   | 15 (4- 35)  |
| <b>Headache</b>                              |        |           |             |          |             |
|                                              | Dose 1 | 66 / 371  | 18 (14- 22) | 9 / 54   | 17 (8- 29)  |
|                                              | 2      | 80 / 367  | 22 (18- 26) | 6 / 28   | 21 (8- 41)  |
|                                              | 3      | 56 / 288  | 19 (15- 24) | 4 / 26   | 15 (4- 35)  |
| <b>Redness or swelling at injection site</b> |        |           |             |          |             |
|                                              | Dose 1 | 48 / 367  | 13 (10- 17) | 9 / 54   | 17 (8- 20)  |
|                                              | 2      | 63 / 363  | 17 (14- 22) | 1 / 28   | 4 (0- 18)   |
|                                              | 3      | 62 / 283  | 22 (17- 27) | 3 / 27   | 11 (2- 29)  |



|                                    | Dose   | Adults   |             | Children |             |
|------------------------------------|--------|----------|-------------|----------|-------------|
|                                    |        | n/N      | % (95% CI)  | n/N      | % (95% CI)  |
| <b>Shivering or shaking chills</b> |        |          |             |          |             |
|                                    | Dose 1 | 44 / 362 | 12 (9- 16)  | 8 / 52   | 15 (7- 28)  |
|                                    | 2      | 57 / 354 | 16 (12- 20) | 7 / 27   | 26 (11- 46) |
|                                    | 3      | 53 / 277 | 19 (15- 24) | 5 / 26   | 19 (7- 39)  |
| <b>Joint pain</b>                  |        |          |             |          |             |
|                                    | Dose 1 | 40 / 371 | 11 (8- 14)  | 5 / 54   | 9 (3- 20)   |
|                                    | 2      | 63 / 367 | 17 (13- 21) | 1 / 28   | 4 (0- 18)   |
|                                    | 3      | 62 / 288 | 22 (17- 27) | 0 / 26   | 0 (0- 13)   |
| <b>Itch at injection site</b>      |        |          |             |          |             |
|                                    | Dose 1 | 44 / 371 | 12 (9- 16)  | 10 / 54  | 19 (9- 31)  |
|                                    | 2      | 57 / 367 | 16 (12- 20) | 4 / 28   | 14 (4- 33)  |
|                                    | 3      | 47 / 288 | 16 (12- 21) | 6 / 27   | 22 (9- 42)  |
| <b>Fever</b>                       |        |          |             |          |             |
|                                    | Dose 1 | 27 / 351 | 8 (5- 11)   | 6 / 50   | 12 (5- 24)  |
|                                    | 2      | 54 / 351 | 15 (12- 20) | 3 / 25   | 12 (3- 31)  |
|                                    | 3      | 56 / 277 | 20 (16- 25) | 4 / 26   | 15 (4- 35)  |
| <b>Nausea</b>                      |        |          |             |          |             |
|                                    | Dose 1 | 27 / 369 | 7 (5- 10)   | 4 / 54   | 7 (2- 18)   |
|                                    | 2      | 39 / 367 | 11 (8- 14)  | 5 / 28   | 18 (6- 37)  |
|                                    | 3      | 21 / 285 | 7 (5- 11)   | 4 / 26   | 15 (4- 35)  |
| <b>Diarrhoea</b>                   |        |          |             |          |             |
|                                    | Dose 1 | 17 / 371 | 5 (3- 7)    | 5 / 54   | 9 (3- 20)   |
|                                    | 2      | 26 / 367 | 7 (5- 10)   | 0 / 28   | 0 (0- 12)   |
|                                    | 3      | 21 / 288 | 7 (5- 11)   | 2 / 26   | 8 (1- 25)   |

|                                                       | Dose   | Adults   |            | Children |            |
|-------------------------------------------------------|--------|----------|------------|----------|------------|
|                                                       |        | n/N      | % (95% CI) | n/N      | % (95% CI) |
| <b>Hospital admission</b>                             |        |          |            |          |            |
|                                                       | Dose 1 | 20 / 339 | 6 (4- 9)   | 9 / 52   | 17 (8- 30) |
|                                                       | 2      | 16 / 347 | 5 (3- 7)   | 2 / 26   | 8 (1- 25)  |
|                                                       | 3      | 8 / 273  | 3 (1- 6)   | 5 / 26   | 19 (7- 39) |
| <b>Other systemic side effect</b>                     |        |          |            |          |            |
|                                                       | Dose 1 | 13 / 371 | 4 (2- 6)   | 13 / 371 | 4 (2- 6)   |
|                                                       | 2      | 19 / 367 | 5 (3- 8)   | 19 / 367 | 5 (3- 8)   |
|                                                       | 3      | 15 / 288 | 5 (3- 8)   | 15 / 288 | 5 (3- 8)   |
| <b>Emergency department attendance</b>                |        |          |            |          |            |
|                                                       | Dose 1 | 10 / 330 | 3 (1- 6)   | 7 / 54   | 13 (5- 25) |
|                                                       | 2      | 15 / 364 | 4 (2- 7)   | 1 / 27   | 4 (0- 19)  |
|                                                       | 3      | 3 / 286  | 1 (0- 3)   | 6 / 26   | 23 (9- 44) |
| <b>Local doctor visit</b>                             |        |          |            |          |            |
|                                                       | Dose 1 | 10 / 365 | 3 (1- 5)   | 2 / 53   | 4 (0- 13)  |
|                                                       | 2      | 15 / 363 | 4 (2- 7)   | 1 / 27   | 4 (0- 19)  |
|                                                       | 3      | 7 / 285  | 2 (1- 5)   | 0 / 26   | 0 (0- 13)  |
| <b>Delays or interruption to anticancer treatment</b> |        |          |            |          |            |
|                                                       | Dose 1 | 6 / 370  | 2 (1- 3)   | 4 / 54   | 7 (2- 18)  |
|                                                       | 2      | 14 / 365 | 4 (2- 6)   | 0 / 27   | 0 (0- 13)  |
|                                                       | 3      | 6 / 288  | 2 (1- 4)   | 1 / 26   | 4 (0- 20)  |
| <b>Vomiting</b>                                       |        |          |            |          |            |
|                                                       | Dose 1 | 3 / 369  | 1 (0- 2)   | 3 / 54   | 6 (1- 15)  |
|                                                       | 2      | 11 / 366 | 3 (2- 5)   | 2 / 28   | 7 (1- 24)  |
|                                                       | 3      | 5 / 286  | 2 (1- 4)   | 2 / 26   | 8 (1- 25)  |

|                                 | Dose   | Adults  |            | Children |            |
|---------------------------------|--------|---------|------------|----------|------------|
|                                 |        | n/N     | % (95% CI) | n/N      | % (95% CI) |
| <b>Other local side effect</b>  |        |         |            |          |            |
|                                 | Dose 1 | 1 / 371 | 0 (0- 1)   | 1 / 54   | 2 (0- 10)  |
|                                 | 2      | 3 / 367 | 1 (0- 2)   | 0 / 28   | 0 (0- 12)  |
|                                 | 3      | 2 / 288 | 1 (0- 2)   | 1 / 27   | 4 (0- 19)  |
| <b>Treatment for blood clot</b> |        |         |            |          |            |
|                                 | Dose 1 | 3 / 371 | 1 (0- 2)   | 1 / 54   | 2 (0- 10)  |
|                                 | 2      | 1 / 366 | 0 (0- 2)   | 0 / 27   | 0 (0- 13)  |
|                                 | 3      | 2 / 288 | 1 (0- 2)   | 0 / 26   | 0 (0- 13)  |
| <b>Other side effect</b>        |        |         |            |          |            |
|                                 | Dose 1 | 0 / 371 | 0 (0- 1)   | 0 / 54   | 0 (0- 7)   |
|                                 | 2      | 0 / 367 | 0 (0- 1)   | 0 / 28   | 0 (0- 12)  |
|                                 | 3      | 0 / 288 | 0 (0- 1)   | 0 / 27   | 0 (0- 13)  |

\*n = number reporting an adverse effect; N = total number of respondents at timepoint; CI = Confidence Interval ED = Emergency Department

\*\*unscheduled visit to doctor or hospital

### 3h Association of worst patient reported adverse event with receipt of 3<sup>rd</sup> vaccine dose

| Worst side effect* | Received 3 <sup>rd</sup> dose n / N (%) | OR (95% CI)     |
|--------------------|-----------------------------------------|-----------------|
| None               | 37 / 48 (77)                            | —               |
| Mild               | 124 / 148 (84)                          | 1.54 (0.7- 3.4) |
| Moderate           | 98 / 108 (91)                           | 2.91 (1.1- 7.6) |
| Severe             | 48 / 58 (83)                            | 1.43 (0.6- 3.8) |
| Serious            | 11 / 18 (61)                            | 0.47 (0.2- 1.5) |

Multiple imputation was conducted to account for missing data.

The severity of participant-reported AE after the first two vaccinations was not significantly associated with receipt of a third dose [p=0.48]

\*Severity self-reported by 5-point Likert scale (Appendix 1b).

n = number reporting an adverse effect; N = total number of respondents at timepoint; OR = Odds Ratio; CI = Confidence Interval

### **3i Investigator- reported adverse events by vaccine type**

Incidence of investigator-reported adverse events observed between dose 1 and one month post-dose 2; and between dose 3 and 1 month post dose 3, for patients over 60 years, comparing those who received an mRNA vaccine (BNT162b2 or mRNA-1273) and those who received the viral vector (ChadOx1-S) vaccine. 1 patient received a different vaccine for dose 1 and 2 and was excluded.

| Dose                                       | Events / Patients n* / N (%) |              | OR <sup>+</sup> (95% CI) | p-value | RR <sup>++</sup> (95% CI) | p-value |
|--------------------------------------------|------------------------------|--------------|--------------------------|---------|---------------------------|---------|
|                                            | mRNA                         | Viral vector |                          |         |                           |         |
| <b>Thrombotic event</b>                    |                              |              |                          |         |                           |         |
| Dose 1 - 2*                                | 2 / 134 (1)                  | 0 / 37 (0)   | NR                       | 0.32    | NR                        | 0.22    |
| 3**                                        | 0 / 141 (0)                  | 0 / 2 (0)    | NR                       | —       | NR                        | —       |
| <b>Allergic reaction</b>                   |                              |              |                          |         |                           |         |
| Dose 1 - 2                                 | 0 / 134 (0)                  | 0 / 37 (0)   | NR                       | —       | NR                        | —       |
| 3                                          | 0 / 141 (0)                  | 0 / 2 (0)    | NR                       | —       | NR                        | —       |
| <b>Decline in performance status***</b>    |                              |              |                          |         |                           |         |
| Dose 1 - 2                                 | 7 / 132 (5)                  | 4 / 37 (11)  | 2.16 (0.5 - 7.6)         | 0.26    | 1.21 (0.3 - 4.0)          | 0.76    |
| 3                                          | 6 / 134 (4)                  | 0 / 2 (0)    | NR                       | 0.67    | NR                        | 0.67    |
| <b>Lymphadenopathy</b>                     |                              |              |                          |         |                           |         |
| Dose 1 - 2                                 | 8 / 134 (6)                  | 5 / 37 (14)  | 2.46 (0.7 - 7.9)         | 0.15    | 1.35 (0.4 - 4.0)          | 0.60    |
| 3                                          | 3 / 141 (2)                  | 0 / 2 (0)    | NR                       | 0.77    | NR                        | 0.77    |
| <b>Treatment delay</b>                     |                              |              |                          |         |                           |         |
| Dose 1 - 2                                 | 8 / 134 (6)                  | 4 / 37 (11)  | 1.91 (0.5 - 6.5)         | 0.33    | 1.08 (0.3 - 3.4)          | 0.90    |
| 3                                          | 7 / 141 (5)                  | 0 / 2 (0)    | NR                       | 0.65    | NR                        | 0.66    |
| <b>Treatment modification</b>              |                              |              |                          |         |                           |         |
| Dose 1 - 2                                 | 21 / 134 (16)                | 5 / 37 (14)  | 0.84 (0.3 - 2.3)         | 0.74    | 0.51 (0.2 - 1.3)          | 0.15    |
| 3                                          | 15 / 141 (11)                | 0 / 2 (0)    | NR                       | 0.50    | NR                        | 0.52    |
| <b>Treatment delay and/or modification</b> |                              |              |                          |         |                           |         |
| Dose 1 - 2                                 | 23 / 134 (17)                | 7 / 37 (19)  | 1.13 (0.4 - 2.8)         | 0.81    | 0.66 (0.3 - 1.5)          | 0.31    |
| 3                                          | 20 / 141 (14)                | 0 / 2 (0)    | NR                       | 0.44    | NR                        | 0.45    |

\* between dose 1 and one month post-dose 2; \*\* between dose 3 and one month afterwards; \*\*\* Eastern Cooperative Group performance status

+ OR=odds ratio; estimated from a logistic regression model for each adverse event at each time point; ++ RR = relative rate: as the period between doses 1 and 2 differed by vaccine type, a log-link Poisson GLM including the log of the actual time period as an offset was fitted to estimate the relative rate.

NR = not recordable as no events observed in one or both vaccine groups.

Allergic reactions were recorded separately for each dose; we have combined doses 1 & 2 here for consistency

\*n = number reporting an adverse effect; N = total number of respondents at timepoint CI = Confidence Interval

### 3j Serious Adverse Events by vaccine type

The number of SAEs at during each reporting period were compared between vaccine types, relative rate was adjusted according to exposure time.

| Dose    | SAEs / Patients ((SAE rate per 30 person days)#) |                          | Unadjusted        |         | Adjusted*         |         |
|---------|--------------------------------------------------|--------------------------|-------------------|---------|-------------------|---------|
|         | mRNA (BNT162b2)                                  | Viral vector (ChAdOx1-S) | RR (95% CI)       | p-value | RR (95% CI)       | p-value |
| 1 and 2 | 12 / 135 (0.09)                                  | 10 / 37 (0.27)           | 3.04 (1.28, 7.05) | 0.013   | 1.81 (0.76, 4.20) | 0.17    |
| 3       | 4 / 140 (0.03)                                   | 0 / 2 (0.00)             | —                 | 0.74    | —                 | 0.74    |

#Fitted rate of SAEs per 30 person-days under unadjusted log-link Poisson generalised linear model (GLM),

\*exposure time was adjusted for by adjusted log-link Poisson GLM, to account for differences in dosing schedule and subsequent time at risk during each reporting period. Median exposure time from dose 1 to 1 month post dose 2 was 51 days for mRNA recipients and 80 days for viral vector recipients.

Adj. Adjusted (but I think just simplify the table heading to adjusted)

Exp. Exp. exposure (but as above, covered in the footer)

CI Confidence Interval

RR Relative Rate





### 3k Participant-reported adverse effects by vaccine type

Participant-reported side effects were measured by selected PROCTCAE items (Appendix 1c) in patients over 60 years to compare mRNA and viral vector vaccine types.

| Events / Respondents (%) by vaccine type     |               |              |
|----------------------------------------------|---------------|--------------|
|                                              | mRNA          | Viral vector |
| <b>Pain at injection site</b>                |               |              |
| Dose 1                                       | 74 / 135 (55) | 15 / 39 (38) |
| 2                                            | 71 / 134 (53) | 8 / 35 (23)  |
| 3                                            | 71 / 133 (53) | 1 / 2 (50)   |
| <b>Redness or swelling at injection site</b> |               |              |
| Dose 1                                       | 14 / 132 (11) | 5 / 39 (13)  |
| 2                                            | 16 / 133 (12) | 3 / 34 (9)   |
| 3                                            | 25 / 130 (19) | 2 / 2 (100)  |
| <b>Itch at injection site</b>                |               |              |
| Dose 1                                       | 17 / 135 (13) | 5 / 39 (13)  |
| 2                                            | 16 / 134 (12) | 3 / 35 (9)   |
| 3                                            | 22 / 133 (17) | 0 / 2 (0)    |
| <b>Medication for side effects</b>           |               |              |
| Dose 1                                       | 31 / 135 (23) | 8 / 39 (21)  |
| 2                                            | 32 / 134 (24) | 4 / 35 (11)  |
| 3                                            | 36 / 133 (27) | 1 / 2 (50)   |
| <b>Fatigue</b>                               |               |              |
| Dose 1                                       | 24 / 135 (18) | 4 / 39 (10)  |
| 2                                            | 33 / 134 (25) | 5 / 35 (14)  |
| 3                                            | 35 / 133 (26) | 0 / 2 (0)    |
| <b>Muscle pain</b>                           |               |              |
| Dose 1                                       | 21 / 134 (16) | 5 / 39 (13)  |
| 2                                            | 24 / 133 (18) | 6 / 33 (18)  |
| 3                                            | 28 / 129 (22) | 0 / 2 (0)    |
| <b>Joint pain</b>                            |               |              |
| Dose 1                                       | 14 / 135 (10) | 6 / 39 (15)  |
| 2                                            | 20 / 134 (15) | 6 / 35 (17)  |
| 3                                            | 30 / 133 (23) | 2 / 2 (100)  |

| <b>Events / Respondents (%) by vaccine type</b>       |               |                     |
|-------------------------------------------------------|---------------|---------------------|
|                                                       | <b>mRNA</b>   | <b>Viral vector</b> |
| <b>Shivering or shaking chills</b>                    |               |                     |
| Dose 1                                                | 14 / 131 (11) | 7 / 38 (18)         |
| 2                                                     | 15 / 130 (12) | 6 / 33 (18)         |
| 3                                                     | 24 / 125 (19) | 1 / 2 (50)          |
| <b>Headache</b>                                       |               |                     |
| Dose 1                                                | 20 / 135 (15) | 5 / 39 (13)         |
| 2                                                     | 22 / 134 (16) | 3 / 35 (9)          |
| 3                                                     | 17 / 133 (13) | 2 / 2 (100)         |
| <b>Fever</b>                                          |               |                     |
| Dose 1                                                | 10 / 126 (8)  | 1 / 38 (3)          |
| 2                                                     | 12 / 126 (10) | 1 / 32 (3)          |
| 3                                                     | 20 / 127 (16) | 0 / 2 (0)           |
| <b>Nausea</b>                                         |               |                     |
| Dose 1                                                | 11 / 134 (8)  | 3 / 39 (8)          |
| 2                                                     | 11 / 134 (8)  | 3 / 35 (9)          |
| 3                                                     | 11 / 132 (8)  | 0 / 2 (0)           |
| <b>Diarrhoea</b>                                      |               |                     |
| Dose 1                                                | 9 / 135 (7)   | 1 / 39 (3)          |
| 2                                                     | 9 / 134 (7)   | 2 / 35 (6)          |
| 3                                                     | 8 / 133 (6)   | 0 / 2 (0)           |
| <b>Hospital admission</b>                             |               |                     |
| Dose 1                                                | 7 / 125 (6)   | 0 / 33 (0)          |
| 2                                                     | 4 / 125 (3)   | 2 / 31 (6)          |
| 3                                                     | 4 / 123 (3)   | 0 / 2 (0)           |
| <b>Local doctor visit</b>                             |               |                     |
| Dose 1                                                | 6 / 132 (5)   | 0 / 39 (0)          |
| 2                                                     | 6 / 132 (5)   | 2 / 34 (6)          |
| 3                                                     | 4 / 131 (3)   | 0 / 2 (0)           |
| <b>Other systemic side effect</b>                     |               |                     |
| Dose 1                                                | 5 / 135 (4)   | 1 / 39 (3)          |
| 2                                                     | 4 / 134 (3)   | 1 / 35 (3)          |
| 3                                                     | 2 / 133 (2)   | 1 / 2 (50)          |
| <b>Delays in interruption to anticancer treatment</b> |               |                     |
| Dose 1                                                | 2 / 134 (1)   | 0 / 39 (0)          |
| 2                                                     | 5 / 133 (4)   | 2 / 35 (6)          |
| 3                                                     | 4 / 133 (3)   | 0 / 2 (0)           |

| <b>Events / Respondents (%) by vaccine type</b> |             |                     |
|-------------------------------------------------|-------------|---------------------|
|                                                 | <b>mRNA</b> | <b>Viral vector</b> |
| <b>Vomiting</b>                                 |             |                     |
| Dose 1                                          | 1 / 135 (1) | 0 / 37 (0)          |
| 2                                               | 5 / 134 (4) | 2 / 35 (6)          |
| 3                                               | 3 / 133 (2) | 0 / 2 (0)           |
| <b>Emergency department attendance</b>          |             |                     |
| Dose 1                                          | 2 / 127 (2) | 0 / 29 (0)          |
| 2                                               | 5 / 132 (4) | 1 / 34 (3)          |
| 3                                               | 1 / 132 (1) | 0 / 2 (0)           |
| <b>Treatment for blood clot</b>                 |             |                     |
| Dose 1                                          | 0 / 135 (0) | 2 / 39 (5)          |
| 2                                               | 0 / 133 (0) | 1 / 35 (3)          |
| 3                                               | 2 / 133 (2) | 0 / 2 (0)           |
| <b>Other local side effect</b>                  |             |                     |
| Dose 1                                          | 0 / 135 (0) | 0 / 39 (0)          |
| 2                                               | 0 / 134 (0) | 2 / 35 (6)          |
| 3                                               | 0 / 133 (0) | 0 / 2 (0)           |

### 3I Impact of sequential vaccine doses on health-related quality of life in adults

Quality of life measured using the European Organization for Research and Treatment of Cancer Quality of Life Core Questionnaire 30 item instrument (EORTC QLQC-30). Multiple imputations were completed to account for missing data.

|                            | Dose | Observed |                  |     |                   | Imputed |                  |     |                   | Difference        |         |
|----------------------------|------|----------|------------------|-----|-------------------|---------|------------------|-----|-------------------|-------------------|---------|
|                            |      | N        | Pre<br>Mean (SD) | N   | Post<br>Mean (SD) | N       | Pre<br>Mean (SD) | N   | Post<br>Mean (SD) | Est (95% CI)      | p-value |
| <b>Primary outcomes</b>    |      |          |                  |     |                   |         |                  |     |                   |                   |         |
| Global health status / QoL | 1    | 377      | 68.8 (20.5)      | 366 | 67.3 (22.2)       | 386     | 68.8 (20.6)      | 386 | 67.4 (22.1)       | -1.4 (-3.4 - 0.6) | 0.16    |
|                            | 2    | 368      | 65.9 (22.6)      | 361 | 66.9 (21.5)       | 378     | 66.2 (22.6)      | 378 | 66.9 (21.6)       | 0.7 (-1.2 - 2.6)  | 0.48    |
| Summary score              | 1    | 369      | 82.4 (14.3)      | 360 | 83.0 (14.5)       | 384     | 82.4 (14.4)      | 384 | 82.9 (14.7)       | 0.5 (-0.5 - 1.6)  | 0.30    |
|                            | 2    | 362      | 82.2 (15.4)      | 359 | 81.8 (16.7)       | 377     | 82.6 (15.3)      | 377 | 81.8 (16.6)       | -0.8 (-1.9 - 0.3) | 0.17    |
| <b>Functional scales</b>   |      |          |                  |     |                   |         |                  |     |                   |                   |         |
| Physical functioning       | 1    | 379      | 81.7 (19.7)      | 368 | 82.2 (18.9)       | 387     | 81.6 (19.8)      | 387 | 82.2 (18.9)       | 0.7 (-0.7 - 2.1)  | 0.35    |
|                            | 2    | 369      | 81.1 (20.9)      | 362 | 81.9 (21.0)       | 378     | 81.3 (20.8)      | 378 | 82.0 (21.0)       | 0.7 (-0.9 - 2.2)  | 0.40    |
| Role functioning           | 1    | 379      | 76.5 (27.3)      | 367 | 77.8 (26.7)       | 387     | 76.4 (27.3)      | 387 | 77.7 (26.8)       | 1.3 (-1.2 - 3.8)  | 0.29    |
|                            | 2    | 369      | 77.7 (27.2)      | 362 | 76.6 (29.1)       | 378     | 78.0 (27.1)      | 378 | 76.7 (28.9)       | -1.3 (-3.7 - 1.1) | 0.28    |
| Emotional functioning      | 1    | 377      | 80.4 (19.4)      | 367 | 81.2 (20.2)       | 386     | 80.2 (19.6)      | 386 | 81.3 (20.2)       | 1.1 (-0.5 - 2.8)  | 0.19    |
|                            | 2    | 368      | 80.2 (20.1)      | 361 | 79.8 (22.8)       | 378     | 80.4 (20.1)      | 378 | 79.9 (22.7)       | -0.5 (-2.1 - 1.1) | 0.56    |
| Cognitive functioning      | 1    | 377      | 85.0 (19.6)      | 367 | 84.8 (20.4)       | 386     | 84.8 (19.8)      | 386 | 84.9 (20.2)       | 0.0 (-1.8 - 1.8)  | 0.97    |
|                            | 2    | 369      | 83.5 (20.7)      | 361 | 82.8 (22.1)       | 378     | 83.7 (20.6)      | 378 | 82.8 (22.1)       | -0.9 (-2.8 - 1.0) | 0.34    |
| Social functioning         | 1    | 376      | 80.0 (26.0)      | 367 | 81.4 (26.5)       | 386     | 79.9 (26.0)      | 386 | 81.4 (26.5)       | 1.5 (-1.1 - 4.0)  | 0.25    |
|                            | 2    | 368      | 80.6 (27.4)      | 361 | 79.6 (28.7)       | 378     | 80.9 (27.2)      | 378 | 79.6 (28.6)       | -1.3 (-3.7 - 1.0) | 0.26    |

| <b>Symptom scales /items</b> |   |     |             |     |             |     |             |     |             |                   |       |
|------------------------------|---|-----|-------------|-----|-------------|-----|-------------|-----|-------------|-------------------|-------|
| Fatigue                      | 1 | 377 | 32.2 (24.5) | 367 | 31.4 (24.7) | 386 | 32.4 (24.5) | 386 | 31.4 (24.6) | -1.0 (-3.1 - 1.2) | 0.39  |
|                              | 2 | 369 | 33.3 (24.5) | 361 | 33.7 (26.7) | 378 | 33.0 (24.4) | 378 | 33.7 (26.7) | 0.6 (-1.4 - 2.7)  | 0.54  |
| Nausea & vomiting            | 1 | 377 | 6.1 (12.9)  | 366 | 5.9 (12.7)  | 386 | 6.3 (13.3)  | 386 | 6.0 (12.8)  | -0.4 (-1.7 - 1.0) | 0.58  |
|                              | 2 | 369 | 6.5 (13.7)  | 361 | 6.7 (13.2)  | 378 | 6.5 (13.7)  | 378 | 6.8 (13.2)  | 0.3 (-1.0 - 1.5)  | 0.66  |
| Pain                         | 1 | 379 | 20.2 (23.5) | 367 | 22.8 (25.6) | 387 | 20.2 (23.6) | 387 | 22.8 (25.5) | 2.6 (0.4 - 4.7)   | 0.020 |
|                              | 2 | 369 | 21.7 (26.8) | 362 | 24.2 (27.5) | 378 | 21.5 (26.7) | 378 | 24.2 (27.5) | 2.7 (0.4 - 5.0)   | 0.021 |
| Dyspnoea                     | 1 | 378 | 13.9 (21.3) | 366 | 12.4 (20.2) | 387 | 13.9 (21.2) | 387 | 12.3 (20.2) | -1.6 (-3.6 - 0.4) | 0.11  |
|                              | 2 | 369 | 15.3 (22.6) | 362 | 15.1 (22.3) | 378 | 15.0 (22.5) | 378 | 15.2 (22.3) | 0.1 (-1.8 - 2.1)  | 0.89  |
| Insomnia                     | 1 | 376 | 25.0 (27.0) | 366 | 23.6 (28.1) | 386 | 25.3 (27.3) | 386 | 23.3 (27.9) | -2.0 (-4.4 - 0.4) | 0.096 |
|                              | 2 | 369 | 23.6 (26.4) | 360 | 23.8 (27.5) | 378 | 23.4 (26.3) | 378 | 23.7 (27.6) | 0.3 (-2.2 - 2.8)  | 0.80  |
| Appetite loss                | 1 | 375 | 13.5 (25.1) | 364 | 13.1 (22.5) | 385 | 13.4 (25.0) | 385 | 13.1 (22.4) | -0.4 (-2.6 - 1.9) | 0.75  |
|                              | 2 | 367 | 13.2 (23.6) | 360 | 14.2 (24.2) | 378 | 12.9 (23.4) | 378 | 14.1 (24.1) | 1.2 (-0.8 - 3.2)  | 0.25  |
| Constipation                 | 1 | 375 | 12.1 (23.0) | 365 | 13.4 (23.8) | 386 | 12.2 (23.2) | 386 | 13.1 (23.6) | 1.0 (-1.3 - 3.2)  | 0.39  |
|                              | 2 | 366 | 11.2 (21.2) | 361 | 12.0 (22.0) | 378 | 11.1 (21.1) | 378 | 12.0 (22.1) | 0.9 (-1.2 - 3.1)  | 0.40  |
| Diarrhoea                    | 1 | 377 | 8.1 (18.2)  | 366 | 7.1 (17.6)  | 386 | 8.2 (18.1)  | 386 | 7.0 (17.5)  | -1.1 (-3.0 - 0.7) | 0.23  |
|                              | 2 | 366 | 9.4 (20.2)  | 361 | 7.9 (18.9)  | 378 | 9.2 (20.0)  | 378 | 8.3 (19.6)  | -0.9 (-2.9 - 1.0) | 0.35  |
| Financial difficulties       | 1 | 375 | 14.2 (26.1) | 367 | 13.4 (26.3) | 386 | 14.4 (26.3) | 386 | 13.5 (26.6) | -0.8 (-2.9 - 1.2) | 0.41  |
|                              | 2 | 368 | 13.5 (25.8) | 361 | 12.7 (25.8) | 378 | 13.3 (25.6) | 378 | 12.8 (25.9) | -0.5 (-2.3 - 1.4) | 0.61  |

N = number; SD = Standard Deviation; QoL = Quality of Life; Est = Estimated; CI= Confidence Interval

### 3m Impact of sequential doses on health-related quality of life in children

#### i. Child reported questionnaires

|                               | Dose | Observed |               |    |                | Imputed |               |    |                | Difference       |         |
|-------------------------------|------|----------|---------------|----|----------------|---------|---------------|----|----------------|------------------|---------|
|                               |      | N        | Pre Mean (SD) | N  | Post Mean (SD) | N       | Pre Mean (SD) | N  | Post Mean (SD) | Est (95% CI)     | p-value |
| <b>Primary outcomes</b>       |      |          |               |    |                |         |               |    |                |                  |         |
| Total score                   | 1    | 45       | 70.1 (19.1)   | 39 | 71.2 (17.5)    | 53      | 67.6 (19.7)   | 53 | 71.8 (17.2)    | 4.3 (0.9- 7.7)   | 0.015   |
|                               | 2    | 45       | 72.8 (17.1)   | 32 | 74.5 (15.7)    | 48      | 72.0 (17.1)   | 48 | 75.7 (15.5)    | 3.7 (0.7- 6.8)   | 0.017   |
| <b>Dimensions</b>             |      |          |               |    |                |         |               |    |                |                  |         |
| Pain and hurt                 | 1    | 45       | 68.1 (27.1)   | 39 | 73.4 (23.5)    | 53      | 66.7 (27.0)   | 53 | 73.8 (23.3)    | 7.2 (-0.3- 14.7) | 0.060   |
|                               | 2    | 45       | 72.8 (26.0)   | 32 | 75.4 (22.8)    | 48      | 72.3 (26.2)   | 48 | 74.7 (22.8)    | 2.4 (-5.1- 10.0) | 0.51    |
| Nausea                        | 1    | 45       | 68.9 (27.4)   | 39 | 74.5 (22.0)    | 53      | 65.4 (28.7)   | 53 | 73.9 (21.7)    | 8.5 (3.5- 13.6)  | 0.002   |
|                               | 2    | 45       | 73.4 (24.2)   | 32 | 74.2 (23.7)    | 48      | 71.6 (25.0)   | 48 | 74.5 (23.9)    | 2.9 (-1.4- 7.2)  | 0.18    |
| Procedural anxiety            | 1    | 45       | 68.3 (30.1)   | 39 | 69.0 (29.4)    | 53      | 68.7 (29.6)   | 53 | 70.9 (28.2)    | 2.1 (-6.1- 10.4) | 0.60    |
|                               | 2    | 45       | 73.5 (27.4)   | 32 | 77.9 (27.2)    | 48      | 74.8 (27.1)   | 48 | 79.8 (25.9)    | 5.0 (-1.0- 11.0) | 0.099   |
| Treatment anxiety             | 1    | 45       | 81.9 (22.1)   | 39 | 77.4 (26.1)    | 53      | 79.6 (23.2)   | 53 | 79.9 (24.5)    | 0.3 (-5.5- 6.1)  | 0.92    |
|                               | 2    | 45       | 82.6 (23.0)   | 32 | 86.2 (24.1)    | 48      | 83.0 (22.5)   | 48 | 88.1 (22.2)    | 5.1 (0.5- 9.8)   | 0.031   |
| Worry                         | 1    | 45       | 70.9 (25.3)   | 39 | 67.5 (25.5)    | 53      | 67.6 (26.6)   | 53 | 68.1 (24.9)    | 0.5 (-5.5- 6.5)  | 0.86    |
|                               | 2    | 45       | 72.4 (23.8)   | 32 | 74.7 (21.8)    | 48      | 71.5 (23.9)   | 48 | 76.1 (21.7)    | 4.6 (-0.6- 9.8)  | 0.083   |
| Cognitive problems            | 1    | 45       | 60.9 (25.2)   | 39 | 62.7 (24.1)    | 53      | 58.8 (24.9)   | 53 | 61.8 (23.5)    | 3.0 (-1.6- 7.6)  | 0.20    |
|                               | 2    | 45       | 63.4 (20.9)   | 32 | 61.1 (19.7)    | 48      | 62.4 (21.6)   | 48 | 63.5 (19.3)    | 1.1 (-3.9- 6.0)  | 0.66    |
| Perceived physical appearance | 1    | 45       | 69.8 (27.1)   | 39 | 72.6 (26.5)    | 53      | 68.1 (27.3)   | 53 | 73.3 (26.0)    | 5.2 (-1.9- 12.2) | 0.15    |
|                               | 2    | 45       | 73.9 (27.9)   | 32 | 76.0 (30.6)    | 48      | 72.3 (28.4)   | 48 | 77.5 (30.0)    | 5.2 (-2.0- 12.4) | 0.15    |
| Communication                 | 1    | 45       | 78.3 (20.8)   | 39 | 76.5 (19.8)    | 53      | 76.4 (21.6)   | 53 | 76.8 (19.2)    | 0.4 (-6.0- 6.7)  | 0.91    |
|                               | 2    | 45       | 76.3 (19.5)   | 32 | 79.4 (17.5)    | 48      | 76.2 (19.7)   | 48 | 78.9 (16.8)    | 2.6 (-2.6- 7.9)  | 0.32    |

N = Number; SD = Standard Deviation; Est = Estimated; CI = Confidence Interval

ii. Parent reported questionnaires

Parent-reported Quality of Life (QoL) was collected using Pediatric Quality of Life Inventory™ (PedsQL) for children aged 5-19 years. Higher scores indicate better health related QoL.

|                               | Dose | Observed |                  |    |                   | Imputed |                  |    |                   | Difference        |         |
|-------------------------------|------|----------|------------------|----|-------------------|---------|------------------|----|-------------------|-------------------|---------|
|                               |      | N        | Pre<br>Mean (SD) | N  | Post<br>Mean (SD) | N       | Pre<br>Mean (SD) | N  | Post<br>Mean (SD) | Est (95% CI)      | p-value |
| <b>Primary outcomes</b>       |      |          |                  |    |                   |         |                  |    |                   |                   |         |
| Total score                   | 1    | 54       | 72.1 (15.7)      | 55 | 74.2 (16.7)       | 70      | 71.5 (16.3)      | 70 | 72.4 (16.8)       | 0.9 (-2.0 - 3.7)  | 0.55    |
|                               | 2    | 49       | 70.9 (17.8)      | 45 | 73.1 (17.5)       | 56      | 70.4 (17.4)      | 56 | 73.5 (17.1)       | 3.1 (0.1 - 6.1)   | 0.046   |
| <b>Dimensions</b>             |      |          |                  |    |                   |         |                  |    |                   |                   |         |
| Pain and hurt                 | 1    | 54       | 68.1 (25.4)      | 55 | 75.9 (22.0)       | 70      | 66.4 (26.1)      | 70 | 73.9 (21.5)       | 7.5 (1.8 - 13.1)  | 0.011   |
|                               | 2    | 50       | 71.5 (24.7)      | 46 | 72.6 (27.3)       | 58      | 72.1 (24.7)      | 58 | 72.5 (27.0)       | 0.3 (-4.5 - 5.2)  | 0.88    |
| Nausea                        | 1    | 54       | 73.1 (23.9)      | 55 | 75.4 (24.3)       | 70      | 72.5 (24.2)      | 70 | 72.1 (25.0)       | -0.4 (-5.4 - 4.7) | 0.88    |
|                               | 2    | 49       | 71.3 (25.1)      | 46 | 74.2 (25.5)       | 57      | 70.5 (24.8)      | 57 | 74.0 (24.9)       | 3.5 (-0.7 - 7.7)  | 0.10    |
| Procedural anxiety            | 1    | 54       | 71.1 (28.5)      | 55 | 72.4 (28.1)       | 70      | 72.6 (27.2)      | 70 | 72.1 (27.9)       | -0.5 (-6.1 - 5.1) | 0.86    |
|                               | 2    | 49       | 72.2 (29.5)      | 45 | 74.4 (25.6)       | 56      | 73.1 (28.3)      | 56 | 75.0 (25.7)       | 1.9 (-3.6 - 7.5)  | 0.48    |
| Treatment anxiety             | 1    | 54       | 81.2 (22.7)      | 55 | 80.6 (26.5)       | 70      | 79.5 (24.1)      | 70 | 80.8 (25.9)       | 1.3 (-4.3 - 6.8)  | 0.65    |
|                               | 2    | 49       | 77.2 (27.6)      | 45 | 80.9 (26.3)       | 56      | 77.5 (26.7)      | 56 | 82.0 (25.2)       | 4.5 (-0.4 - 9.5)  | 0.073   |
| Worry                         | 1    | 54       | 74.1 (21.6)      | 55 | 75.0 (21.8)       | 70      | 73.8 (21.5)      | 70 | 74.1 (21.7)       | 0.3 (-3.9 - 4.5)  | 0.90    |
|                               | 2    | 49       | 71.3 (24.4)      | 45 | 71.3 (23.6)       | 56      | 69.5 (24.1)      | 56 | 72.6 (23.7)       | 3.1 (-1.5 - 7.7)  | 0.18    |
| Cognitive problems            | 1    | 53       | 60.9 (22.3)      | 54 | 64.9 (21.4)       | 70      | 60.3 (22.3)      | 70 | 63.1 (21.5)       | 2.8 (-1.7 - 7.4)  | 0.22    |
|                               | 2    | 49       | 62.1 (21.0)      | 45 | 63.3 (20.6)       | 56      | 61.4 (21.2)      | 56 | 63.9 (20.0)       | 2.5 (-2.2 - 7.1)  | 0.29    |
| Perceived physical appearance | 1    | 53       | 76.7 (24.4)      | 54 | 75.8 (22.1)       | 70      | 75.0 (24.5)      | 70 | 74.7 (22.3)       | -0.3 (-4.6 - 4.0) | 0.88    |
|                               | 2    | 49       | 70.9 (27.8)      | 44 | 76.3 (26.4)       | 56      | 70.5 (27.5)      | 56 | 76.0 (25.9)       | 5.4 (-2.0 - 12.8) | 0.15    |

|               | Dose | Observed |                  |    |                   | Imputed |                  |    |                   | Difference<br>Est (95% CI) | p-value |
|---------------|------|----------|------------------|----|-------------------|---------|------------------|----|-------------------|----------------------------|---------|
|               |      | N        | Pre<br>Mean (SD) | N  | Post<br>Mean (SD) | N       | Pre<br>Mean (SD) | N  | Post<br>Mean (SD) |                            |         |
| Communication | 1    | 52       | 75.7 (19.9)      | 54 | 78.2 (20.8)       | 70      | 76.1 (20.2)      | 70 | 77.5 (20.8)       | 1.4 (-3.1 - 6.0)           | 0.52    |
|               | 2    | 49       | 75.9 (20.7)      | 44 | 78.0 (20.8)       | 56      | 75.7 (20.8)      | 56 | 77.7 (21.5)       | 2.0 (-3.1 - 7.0)           | 0.43    |

N = Number; SD = Standard Deviation; Est = Estimated; CI = Confidence Interval



### 3n Baseline health-related quality of life and vaccine related beliefs

Scores from the baseline Oxford vaccine Confidence and Complacency Scale were correlated with domains in the baseline quality of life questionnaires.

| QoL scale                  | N   | Correlation (95% CI)* |
|----------------------------|-----|-----------------------|
| <b>Adults (QLQ-C30)</b>    |     |                       |
| Emotional functioning      | 246 | -0.18 (-0.31 - 0.04)  |
| Global health status       | 246 | -0.17 (-0.29 - 0.03)  |
| Summary score              | 241 | -0.17 (-0.30 - 0.04)  |
| <b>Children** (PedsQL)</b> |     |                       |
| Worry                      | 35  | -0.02 (-0.35 - 0.32)  |
| Procedural anxiety         | 35  | -0.13 (-0.44 - 0.21)  |
| Treatment anxiety          | 35  | -0.19 (-0.52 - 0.15)  |
| Communication              | 35  | -0.36 (-0.63 - 0.02)  |
| Total score                | 35  | -0.39 (-0.68 - 0.08)  |

N = Number of responses; CI = Confidence Interval;

\* using an estimated Spearman correlation coefficient r

\*\* if child's response was unavailable, parent response was used
